# Supplementary material for: Hydrogen oxidation catalysis by a nickel diphosphine complex with pendant tert-butyl amines
Source: Royal Society of Chemistry journal article supplement (doi:10.1039/c0cc03246h), 2010-01-01
Supplement: c0cc03246h.pdf [file c0cc03246h.pdf]

## Hydrogen Oxidation Catalysis by a Nickel Diphosphine Complex with Pendant *t*-Butyl Amines

Jenny Yang,<sup>\*a</sup> Shentan Chen,<sup>a</sup> William G. Dougherty,<sup>b</sup> W. Scott Kassel,<sup>b</sup> R. Morris Bullock,<sup>a</sup> Daniel L. DuBois,<sup>a</sup> Simone Raugei,<sup>a</sup> Roger Rousseau,<sup>a</sup> Michel Dupuis,<sup>a</sup> and M. Rakowski DuBois<sup>a</sup>

<sup>a</sup> Center for Molecular Electrocatalysis, Chemical and Material Science Division, Pacific Northwest National Laboratory, Richland, WA, U. S. A.. 99352. Fax: 509-375-6660; Tel:509-372-4639; E-mail: jenny.yang@pnl.gov

<sup>b</sup> Department of Chemistry, Villanova University, Villanova, Pennsylvania, U.S.A.

### Table of Contents

|                                                                                                                                              |            |
|----------------------------------------------------------------------------------------------------------------------------------------------|------------|
| Experimental Details and Synthesis                                                                                                           | <b>S2</b>  |
| Crystal Structure Data and Tables for [Ni(P <sup>Cy</sup> <sub>2</sub> N <sup>t-Bu</sup> <sub>2</sub> )](BF <sub>4</sub> ) <sub>2</sub> (1). | <b>S5</b>  |
| Theoretical Methods                                                                                                                          | <b>S16</b> |

## Experimental

**General Experimental Procedures.**  $^1\text{H}$  and  $^{31}\text{P}$  NMR spectra were recorded on a Varian Inova spectrometer (500 MHz for  $^1\text{H}$ ) at 20 °C unless otherwise noted. All  $^1\text{H}$  chemical shifts have been internally calibrated to the monoprotio impurity of the deuterated solvent. The  $^{31}\text{P}$  NMR spectra were proton decoupled and referenced to external phosphoric acid.

All electrochemical experiments were carried out under an atmosphere of nitrogen, or hydrogen when indicated, in 0.2 M  $\text{Et}_4\text{NBF}_4$  acetonitrile solutions or 0.2 M  $\text{Bu}_4\text{NPF}_6$  benzonitrile solutions. Cyclic voltammetry experiments were performed with a CH Instruments model 660C potentiostat. Ferrocene was used as an internal standard, and all potentials are referenced to the ferrocenium/ferrocene couple.

**Synthesis and Materials.** All reactions and manipulations were performed under an  $\text{N}_2$  atmosphere using standard Schlenk techniques or a glovebox unless otherwise indicated. Solvents were dried using an activated alumina column.  $[\text{Ni}(\text{CH}_3\text{CN})_6](\text{BF}_4)_2$  was prepared as described using literature methods.<sup>1</sup>

**Bishydroxymethylcyclohexylphosphine·(H<sub>2</sub>O)<sub>0.2</sub>.** Cyclohexyl phosphine (10.03 g, 86.36 mmol) was added to 20 mL of absolute ethanol with paraformaldehyde (5.31 g, 177 mmol). After heating the solution to 70 °C for 2 hours, the solvent was removed under reduced pressure. The residue was dissolved in 20 mL of THF. Hexane (80 mL) was added and the mixture was cooled in a -35 °C freezer overnight, precipitating the product as colorless crystals. The product was isolated by filtration and washed with 2 x 20 mL of hexane (14.9 g, 98% yield).  $^1\text{H}$  NMR ( $\text{d}^6$ -acetone):  $\delta$  4.13 (m, 4H), 2.23 (m, 2H), 2.06 (s, 1H), 1.87-1.70 (m, 4H), 1.33-1.22 (m, 4H).  $^{31}\text{P}$  NMR ( $\text{CD}_3\text{CN}$ ):  $\delta$  -11.83.  $^{13}\text{C}$  NMR ( $\text{CD}_3\text{CN}$ ):  $\delta$  58.85 (d,  $J$  = 18.7 Hz), 44.99 (d,  $J$  = 0.8 Hz), 29.00 (d,  $J$  = 14.0 Hz), 26.97 (d,  $J$  = 6.7 Hz), 26.34 (dd,  $J$  = 22.1, 5.9 Hz). Anal. Calcd. for  $\text{C}_8\text{H}_{17.4}\text{O}_{2.2}\text{P}$ : C, 53.44; H, 9.75; N, 0.00. Found: C, 53.23; H, 9.76; N, 0.00.

**$\text{P}^{\text{Cy}}_2\text{N}^{\text{t-Bu}}_2$ .** Bishydroxymethylcyclohexylphosphine (4.00 g, 0.023 mol) was dissolved in 100 mL of degassed ethanol and heated to 70 °C. *t*-Butylamine (2.40 mL, 0.023 mol) was added dropwise over 30 minutes, and the reaction was stirred for 12 hours at 70 °C. The solvent was

S2

removed under reduced pressure to give an oil. This was redissolved in 15 mL of diethyl ether, followed by addition of 30 mL of acetonitrile and cooled in a  $-35\text{ }^{\circ}\text{C}$  freezer overnight. The product precipitated as a colorless microcrystalline solid, and was isolated by filtration and washed with  $2 \times 6$  mL acetonitrile (3.44 g, 70% yield).  $^1\text{H}$  NMR ( $\text{CD}_2\text{Cl}_2$ )  $\delta$  3.42 (d,  $J = 9.5$  Hz, 2H), 3.37-3.15 (m, 4H), 3.03 (d,  $J = 13$  Hz, 2H), 1.99 (m, 12H), 1.49 (bs, 10H), 1.40 (s, 9H), 1.36 (s, 9H).  $^{31}\text{P}$  NMR ( $\text{CD}_2\text{Cl}_2$ ):  $\delta$   $-21.37$ ,  $-26.06$  (ratio 3:4).  $^{13}\text{C}$  NMR ( $\text{CD}_2\text{Cl}_2$ ):  $\delta$  56.30 (d,  $J = 5.6$  Hz), 55.96 (s), 48.95 (s), 47.65 (dd,  $J = 12.0$ , 7.5 Hz), 45.09 – 44.91 (m), 37.02 (s), 35.46 (d,  $J = 13.0$  Hz), 29.90 (dd,  $J = 13.5$ , 9.6 Hz), 27.33 (s), 27.26 – 26.92 (m), 26.68 (d,  $J = 19.1$  Hz). Anal. Calcd for  $\text{C}_{24}\text{H}_{48}\text{N}_2\text{P}_2$ : C, 67.57; H, 11.34; N, 6.57. Found: C, 67.76; H, 11.55; N, 6.53.

**$[\text{Ni}(\text{P}^{\text{Cy}}_2\text{N}^{\text{t-Bu}}_2)](\text{BF}_4)_2 \cdot (\text{CH}_3\text{CN})_{1.4}(\text{Et}_2\text{O})_{0.6}$  (1).**  $\text{P}^{\text{Cy}}_2\text{N}^{\text{t-Bu}}_2$  (1.00 g, 2.30 mmol) and  $[\text{Ni}(\text{CH}_3\text{CN})_6](\text{BF}_4)_2$  (0.576 g, 1.15 mmol) was added to 6 mL of acetonitrile. After stirring for one hour at room temperature, 10 mL of diethyl ether was added and the solution was left to stand overnight. The product precipitated as dark red crystals, which were isolated by filtration, and washed with a 6 mL of a 1:3 acetonitrile: diethyl ether solution (0.80 g, 61% yield).  $^1\text{H}$  NMR ( $\text{CD}_3\text{CN}$ )  $\delta$  3.61 (d,  $J = 13.6$  Hz, 4H), 3.21 (d,  $J = 13.7$  Hz, 4H), 3.14 (d,  $J = 13.3$  Hz, 4H), 3.06 (d,  $J = 13.7$  Hz, 4H), 1.99 (m, 12H), 1.84 (s, 4H), 1.76 (d,  $J = 13.2$  Hz, 4H), 1.54 (s, 8H), 1.44 (d,  $J = 8.5$  Hz, 12H), 1.19 (s, 36H).  $^{31}\text{P}$  NMR ( $\text{CD}_3\text{CN}$ ):  $\delta$  9.38. Anal. Calcd. for  $\text{C}_{53.1}\text{H}_{106}\text{B}_2\text{F}_8\text{N}_{5.42}\text{NiP}_4\text{O}_{0.6}$ : C, 53.79; H, 9.00; N, 6.40. Found: C, 53.20; H, 9.08; N, 6.05.

**$[\text{Ni}(\text{P}^{\text{Cy}}_2\text{N}^{\text{t-Bu}}_2)]$  (2).**  $[\text{Ni}(\text{P}^{\text{Cy}}_2\text{N}^{\text{t-Bu}}_2)](\text{BF}_4)_2$  (0.488 g, 0.432 mmol) was dissolved in 6 mL of acetonitrile. After the solution was purged with hydrogen for 10 minutes, 1,8-diazabicyclo[5.4.0]undec-7-ene (DBU, 0.16 mL, 1.1 mmol) was added. The resulting very pale yellow precipitate was collected by filtration and washed with  $2 \times 6$  mL of acetonitrile to give 0.350 g product (88% yield).  $^1\text{H}$  NMR ( $\text{C}_6\text{D}_6$ ):  $\delta$  3.67 (s, 4H), 3.14 (s, 4H), 2.93 (d,  $J = 6.4$  Hz, 8H), 2.85 (s, 4H), 2.65 (s, 4H), 2.09 (s, 8H), 1.98 (s, 8H), 1.74 (d,  $J = 4.9$  Hz, 12H), 1.59 (s, 4H), 1.53 – 1.27 (m, 36H).  $^{31}\text{P}$  NMR ( $\text{C}_6\text{D}_6$ ):  $\delta$  7.41. Anal. Calcd. for  $\text{C}_{48}\text{H}_{96}\text{N}_4\text{NiP}_4$ : C, 63.22; H, 10.61; N, 6.14. Found: C, 63.15; H, 10.71; N, 5.96.

**Electrocatalytic Oxidation of Hydrogen with 2.** A benzonitrile solution (3.0 mL) containing 0.2 M Bu<sub>4</sub>NPF<sub>6</sub> and **2** (0.57 mM) was added to an electrochemical cell under nitrogen. After the solution was purged with hydrogen for 10 min, successive cyclic voltammograms were recorded upon addition of increasing amounts of triethylamine. The initial amount of triethylamine added was 1.0 μL (4 equiv) and the final amount was 30 μL (124 equiv). The catalytic current was taken at -0.65 V. A plot of the catalytic current/peak current ( $i_c/i_p$ ) versus the concentration of triethylamine showed no dependence on base after addition of 20 μL (83 equiv) of triethylamine. The plot is shown below.

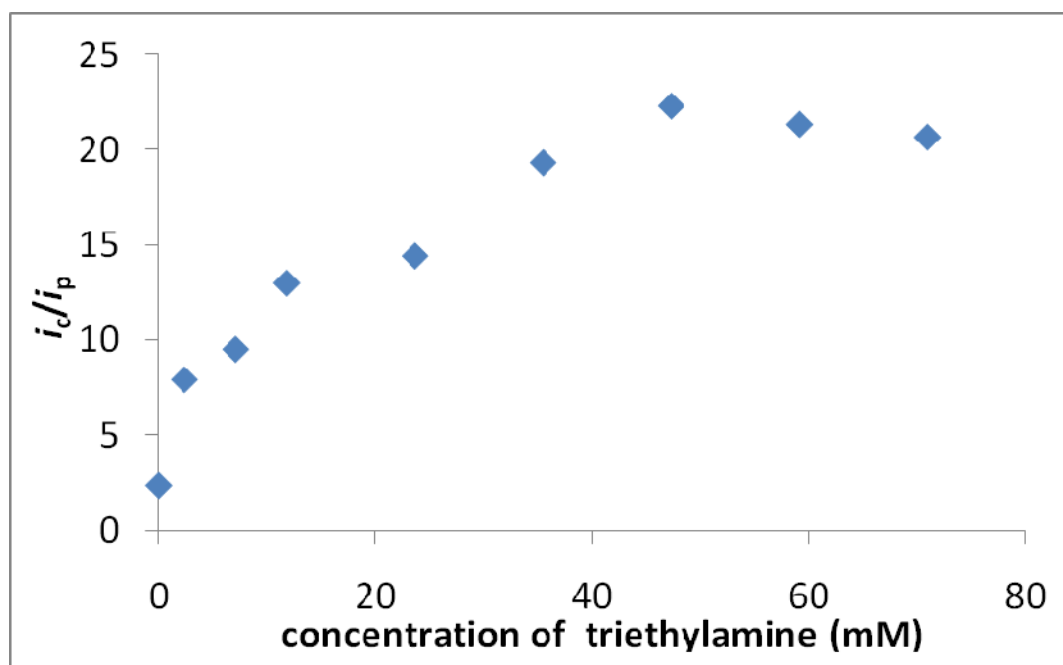

**Table S1.** Crystal data and structure refinement for [Ni(P<sup>Cy</sup><sub>2</sub>N<sup>t-Bu</sup><sub>2</sub>)](BF<sub>4</sub>)<sub>2</sub> (**1**).

|                                   |                                                                                                                                     |
|-----------------------------------|-------------------------------------------------------------------------------------------------------------------------------------|
| Identification code               | pnl086                                                                                                                              |
| Empirical formula                 | C <sub>26.57</sub> H <sub>53</sub> B F <sub>4</sub> N <sub>2.71</sub> Ni <sub>0.50</sub> O <sub>0.29</sub> P <sub>2</sub>           |
| Formula weight                    | 593.25                                                                                                                              |
| Temperature                       | 100(2) K                                                                                                                            |
| Wavelength                        | 0.71073 Å                                                                                                                           |
| Crystal system                    | Monoclinic                                                                                                                          |
| Space group                       | C2/c                                                                                                                                |
| Unit cell dimensions              | a = 20.9513(10) Å $\alpha = 90^\circ$ .<br>b = 13.9953(6) Å $\beta = 101.782(2)^\circ$ .<br>c = 22.0669(10) Å $\gamma = 90^\circ$ . |
| Volume                            | 6334.1(5) Å <sup>3</sup>                                                                                                            |
| Z                                 | 8                                                                                                                                   |
| Density (calculated)              | 1.244 Mg/m <sup>3</sup>                                                                                                             |
| Absorption coefficient            | 0.470 mm <sup>-1</sup>                                                                                                              |
| F(000)                            | 2550                                                                                                                                |
| Crystal size                      | 0.16 x 0.16 x 0.08 mm <sup>3</sup>                                                                                                  |
| Theta range for data collection   | 1.89 to 33.27°.                                                                                                                     |
| Index ranges                      | -31 ≤ h ≤ 32, -13 ≤ k ≤ 21, -32 ≤ l ≤ 33                                                                                            |
| Reflections collected             | 40666                                                                                                                               |
| Independent reflections           | 12025 [R(int) = 0.0428]                                                                                                             |
| Completeness to theta = 25.00°    | 100.0 %                                                                                                                             |
| Absorption correction             | Semi-empirical from equivalents                                                                                                     |
| Max. and min. transmission        | 0.9634 and 0.9286                                                                                                                   |
| Refinement method                 | Full-matrix least-squares on F <sup>2</sup>                                                                                         |
| Data / restraints / parameters    | 12025 / 2 / 359                                                                                                                     |
| Goodness-of-fit on F <sup>2</sup> | 1.018                                                                                                                               |
| Final R indices [I > 2σ(I)]       | R1 = 0.0472, wR2 = 0.1150                                                                                                           |
| R indices (all data)              | R1 = 0.0791, wR2 = 0.1296                                                                                                           |
| Largest diff. peak and hole       | 0.990 and -0.533 e.Å <sup>-3</sup>                                                                                                  |

**Table S2.** Atomic coordinates ( $\times 10^4$ ) and equivalent isotropic displacement parameters ( $\text{\AA}^2 \times 10^3$ ) for  $[\text{Ni}(\text{P}^{\text{Cy}}_2\text{N}^{\text{t-Bu}}_2)](\text{BF}_4)_2$  (**1**).  $U(\text{eq})$  is defined as one third of the trace of the orthogonalized  $U^{\text{ij}}$  tensor.

|       | x        | y        | z       | U(eq) |
|-------|----------|----------|---------|-------|
| Ni(1) | 10000    | 1122(1)  | 7500    | 12(1) |
| B(1)  | 9401(1)  | 2560(2)  | 4517(1) | 24(1) |
| F(1)  | 9422(1)  | 1655(1)  | 4780(1) | 41(1) |
| F(2)  | 9304(1)  | 2468(1)  | 3880(1) | 35(1) |
| F(3)  | 9990(1)  | 3016(1)  | 4744(1) | 41(1) |
| F(4)  | 8901(1)  | 3073(1)  | 4683(1) | 57(1) |
| N(1)  | 9217(1)  | 766(1)   | 8614(1) | 16(1) |
| N(2)  | 8703(1)  | 1472(1)  | 6422(1) | 17(1) |
| P(1)  | 9950(1)  | 2130(1)  | 6710(1) | 14(1) |
| P(2)  | 10317(1) | 110(1)   | 8282(1) | 13(1) |
| C(1)  | 10922(1) | 3485(1)  | 7170(1) | 23(1) |
| C(2)  | 11088(1) | 4542(1)  | 7298(1) | 32(1) |
| C(3)  | 10984(1) | 5111(1)  | 6698(1) | 35(1) |
| C(4)  | 10299(1) | 4982(1)  | 6315(1) | 34(1) |
| C(5)  | 10139(1) | 3925(1)  | 6181(1) | 25(1) |
| C(6)  | 10221(1) | 3383(1)  | 6799(1) | 18(1) |
| C(7)  | 10451(1) | 1660(1)  | 6172(1) | 18(1) |
| C(8)  | 8604(1)  | 612(1)   | 8856(1) | 22(1) |
| C(9)  | 8290(1)  | -330(1)  | 8599(1) | 31(1) |
| C(10) | 8732(1)  | 599(2)   | 9564(1) | 31(1) |
| C(11) | 8122(1)  | 1409(2)  | 8602(1) | 32(1) |
| C(12) | 9691(1)  | -10(1)   | 8756(1) | 16(1) |
| C(13) | 11060(1) | -1224(1) | 7776(1) | 19(1) |
| C(14) | 11180(1) | -2278(1) | 7644(1) | 25(1) |
| C(15) | 11389(1) | -2830(1) | 8246(1) | 29(1) |
| C(16) | 10896(1) | -2720(1) | 8664(1) | 27(1) |
| C(17) | 10781(1) | -1671(1) | 8800(1) | 20(1) |
| C(18) | 10553(1) | -1139(1) | 8183(1) | 15(1) |
| C(19) | 11061(1) | 582(1)   | 8800(1) | 18(1) |
| C(20) | 7978(1)  | 1603(1)  | 6179(1) | 24(1) |

|       |          |          |         |       |
|-------|----------|----------|---------|-------|
| C(21) | 7623(1)  | 871(2)   | 6507(1) | 36(1) |
| C(22) | 7785(1)  | 1465(2)  | 5475(1) | 36(1) |
| C(23) | 7773(1)  | 2589(2)  | 6352(1) | 44(1) |
| C(24) | 9106(1)  | 2256(1)  | 6271(1) | 18(1) |
| N(3)  | 11633(2) | -5122(2) | 9025(2) | 54(1) |
| C(25) | 11178(2) | -4721(3) | 9999(2) | 43(1) |
| C(26) | 11433(2) | -4950(2) | 9471(2) | 35(1) |
| C(27) | 12841(5) | -1935(7) | 9751(5) | 50(1) |
| C(28) | 12428(6) | -2727(6) | 9984(6) | 50(1) |
| C(29) | 11596(5) | -4525(7) | 9910(5) | 50(1) |
| C(30) | 11603(6) | -5260(9) | 9380(6) | 50(1) |
| O(1)  | 12084(3) | -3776(4) | 9778(3) | 50(1) |

---

**Table S3.** Bond lengths [Å] and angles [°] for [Ni(P<sup>Cy</sup><sub>2</sub>N<sup>t-Bu</sup><sub>2</sub>)](BF<sub>4</sub>)<sub>2</sub> (**1**).

---

|              |            |
|--------------|------------|
| Ni(1)-P(2)   | 2.2272(4)  |
| Ni(1)-P(2)#1 | 2.2272(4)  |
| Ni(1)-P(1)   | 2.2281(4)  |
| Ni(1)-P(1)#1 | 2.2282(4)  |
| B(1)-F(4)    | 1.381(2)   |
| B(1)-F(2)    | 1.385(2)   |
| B(1)-F(1)    | 1.390(2)   |
| B(1)-F(3)    | 1.389(2)   |
| N(1)-C(12)   | 1.4608(19) |
| N(1)-C(7)#1  | 1.462(2)   |
| N(1)-C(8)    | 1.505(2)   |
| N(2)-C(19)#1 | 1.460(2)   |
| N(2)-C(24)   | 1.465(2)   |
| N(2)-C(20)   | 1.515(2)   |
| P(1)-C(6)    | 1.8413(16) |
| P(1)-C(24)   | 1.8439(16) |
| P(1)-C(7)    | 1.8591(16) |
| P(2)-C(18)   | 1.8413(15) |
| P(2)-C(12)   | 1.8428(16) |
| P(2)-C(19)   | 1.8568(16) |
| C(1)-C(2)    | 1.533(3)   |
| C(1)-C(6)    | 1.534(2)   |
| C(2)-C(3)    | 1.523(3)   |
| C(3)-C(4)    | 1.520(3)   |
| C(4)-C(5)    | 1.533(3)   |
| C(5)-C(6)    | 1.539(2)   |
| C(7)-N(1)#1  | 1.462(2)   |
| C(8)-C(10)   | 1.531(3)   |
| C(8)-C(11)   | 1.531(2)   |
| C(8)-C(9)    | 1.529(3)   |
| C(13)-C(18)  | 1.529(2)   |
| C(13)-C(14)  | 1.533(2)   |
| C(14)-C(15)  | 1.522(3)   |
| C(15)-C(16)  | 1.527(3)   |

S8



|                     |             |
|---------------------|-------------|
| C(16)-C(17)         | 1.527(2)    |
| C(17)-C(18)         | 1.540(2)    |
| C(19)-N(2)#1        | 1.460(2)    |
| C(20)-C(23)         | 1.517(3)    |
| C(20)-C(21)         | 1.532(3)    |
| C(20)-C(22)         | 1.536(3)    |
| N(3)-C(26)          | 1.170(5)    |
| C(25)-C(26)         | 1.415(5)    |
| C(27)-C(28)         | 1.557(14)   |
| C(28)-O(1)          | 1.657(9)    |
| C(29)-O(1)          | 1.534(11)   |
| C(29)-C(30)         | 1.560(13)   |
|                     |             |
| P(2)-Ni(1)-P(2)#1   | 100.99(2)   |
| P(2)-Ni(1)-P(1)     | 165.477(14) |
| P(2)#1-Ni(1)-P(1)   | 80.643(15)  |
| P(2)-Ni(1)-P(1)#1   | 80.642(15)  |
| P(2)#1-Ni(1)-P(1)#1 | 165.475(14) |
| P(1)-Ni(1)-P(1)#1   | 101.45(2)   |
| F(4)-B(1)-F(2)      | 110.83(17)  |
| F(4)-B(1)-F(1)      | 108.99(17)  |
| F(2)-B(1)-F(1)      | 108.95(16)  |
| F(4)-B(1)-F(3)      | 109.36(17)  |
| F(2)-B(1)-F(3)      | 110.18(16)  |
| F(1)-B(1)-F(3)      | 108.49(16)  |
| C(12)-N(1)-C(7)#1   | 108.06(12)  |
| C(12)-N(1)-C(8)     | 114.21(12)  |
| C(7)#1-N(1)-C(8)    | 113.03(13)  |
| C(19)#1-N(2)-C(24)  | 108.15(12)  |
| C(19)#1-N(2)-C(20)  | 111.64(13)  |
| C(24)-N(2)-C(20)    | 114.31(12)  |
| C(6)-P(1)-C(24)     | 101.95(7)   |
| C(6)-P(1)-C(7)      | 101.74(7)   |
| C(24)-P(1)-C(7)     | 107.69(8)   |
| C(6)-P(1)-Ni(1)     | 123.73(6)   |
| C(24)-P(1)-Ni(1)    | 110.97(5)   |

S9

|                   |            |
|-------------------|------------|
| C(7)-P(1)-Ni(1)   | 109.51(5)  |
| C(18)-P(2)-C(12)  | 102.77(7)  |
| C(18)-P(2)-C(19)  | 101.46(7)  |
| C(12)-P(2)-C(19)  | 106.84(8)  |
| C(18)-P(2)-Ni(1)  | 123.78(5)  |
| C(12)-P(2)-Ni(1)  | 111.30(5)  |
| C(19)-P(2)-Ni(1)  | 109.25(5)  |
| C(2)-C(1)-C(6)    | 110.14(15) |
| C(3)-C(2)-C(1)    | 110.96(16) |
| C(4)-C(3)-C(2)    | 111.86(16) |
| C(3)-C(4)-C(5)    | 111.53(16) |
| C(4)-C(5)-C(6)    | 108.97(16) |
| C(1)-C(6)-C(5)    | 110.45(14) |
| C(1)-C(6)-P(1)    | 112.68(11) |
| C(5)-C(6)-P(1)    | 113.47(12) |
| N(1)#1-C(7)-P(1)  | 112.85(11) |
| N(1)-C(8)-C(10)   | 112.26(14) |
| N(1)-C(8)-C(11)   | 108.30(14) |
| C(10)-C(8)-C(11)  | 110.29(16) |
| N(1)-C(8)-C(9)    | 108.99(14) |
| C(10)-C(8)-C(9)   | 109.86(16) |
| C(11)-C(8)-C(9)   | 106.98(16) |
| N(1)-C(12)-P(2)   | 109.99(11) |
| C(18)-C(13)-C(14) | 110.33(14) |
| C(15)-C(14)-C(13) | 110.63(15) |
| C(14)-C(15)-C(16) | 111.51(15) |
| C(15)-C(16)-C(17) | 111.67(15) |
| C(16)-C(17)-C(18) | 109.00(14) |
| C(13)-C(18)-C(17) | 110.72(13) |
| C(13)-C(18)-P(2)  | 112.36(11) |
| C(17)-C(18)-P(2)  | 113.35(11) |
| N(2)#1-C(19)-P(2) | 113.41(11) |
| N(2)-C(20)-C(23)  | 109.65(15) |
| N(2)-C(20)-C(21)  | 107.45(14) |
| C(23)-C(20)-C(21) | 107.44(17) |
| N(2)-C(20)-C(22)  | 112.36(15) |

S10

|                   |            |
|-------------------|------------|
| C(23)-C(20)-C(22) | 109.86(18) |
| C(21)-C(20)-C(22) | 109.94(17) |
| N(2)-C(24)-P(1)   | 110.20(11) |
| N(3)-C(26)-C(25)  | 178.2(4)   |
| C(27)-C(28)-O(1)  | 141.2(9)   |
| O(1)-C(29)-C(30)  | 101.5(8)   |
| C(29)-O(1)-C(28)  | 145.3(7)   |

---

Symmetry transformations used to generate equivalent atoms:

#1  $-x+2, y, -z+3/2$

**Table S4.** Anisotropic displacement parameters ( $\text{\AA}^2 \times 10^3$ ) for  $[\text{Ni}(\text{P}^{\text{Cy}}_2\text{N}^{\text{t-Bu}}_2)](\text{BF}_4)_2$  (**1**). The anisotropic

displacement factor exponent takes the form:  $-2h^2 a^* U^{11} + \dots + 2hk a^* b^* U^{12}$  ]

|       | U11   | U22   | U33   | U23    | U13   | U12    |
|-------|-------|-------|-------|--------|-------|--------|
| Ni(1) | 13(1) | 8(1)  | 17(1) | 0      | 4(1)  | 0      |
| B(1)  | 26(1) | 20(1) | 25(1) | -1(1)  | 5(1)  | 0(1)   |
| F(1)  | 66(1) | 23(1) | 30(1) | 2(1)   | 2(1)  | -8(1)  |
| F(2)  | 43(1) | 36(1) | 23(1) | 2(1)   | 2(1)  | 0(1)   |
| F(3)  | 42(1) | 45(1) | 36(1) | -7(1)  | 7(1)  | -20(1) |
| F(4)  | 47(1) | 64(1) | 62(1) | -11(1) | 17(1) | 26(1)  |
| N(1)  | 12(1) | 13(1) | 23(1) | 2(1)   | 6(1)  | 1(1)   |
| N(2)  | 12(1) | 11(1) | 28(1) | 3(1)   | 6(1)  | 1(1)   |
| P(1)  | 14(1) | 10(1) | 20(1) | 1(1)   | 6(1)  | 0(1)   |
| P(2)  | 12(1) | 10(1) | 17(1) | 0(1)   | 3(1)  | 0(1)   |
| C(1)  | 19(1) | 20(1) | 31(1) | -3(1)  | 8(1)  | -5(1)  |
| C(2)  | 29(1) | 22(1) | 47(1) | -11(1) | 16(1) | -12(1) |
| C(3)  | 36(1) | 16(1) | 59(1) | -4(1)  | 23(1) | -11(1) |
| C(4)  | 38(1) | 14(1) | 55(1) | 9(1)   | 20(1) | -3(1)  |
| C(5)  | 26(1) | 15(1) | 35(1) | 7(1)   | 10(1) | 0(1)   |
| C(6)  | 19(1) | 10(1) | 28(1) | 1(1)   | 10(1) | -2(1)  |
| C(7)  | 18(1) | 14(1) | 22(1) | 0(1)   | 9(1)  | -1(1)  |
| C(8)  | 16(1) | 22(1) | 30(1) | 7(1)   | 10(1) | 2(1)   |
| C(9)  | 18(1) | 27(1) | 50(1) | 3(1)   | 13(1) | -5(1)  |
| C(10) | 30(1) | 35(1) | 33(1) | 9(1)   | 20(1) | 5(1)   |
| C(11) | 18(1) | 30(1) | 49(1) | 12(1)  | 12(1) | 6(1)   |
| C(12) | 15(1) | 14(1) | 21(1) | 2(1)   | 6(1)  | 2(1)   |
| C(13) | 17(1) | 17(1) | 22(1) | 0(1)   | 3(1)  | 4(1)   |
| C(14) | 25(1) | 21(1) | 28(1) | -5(1)  | 4(1)  | 9(1)   |
| C(15) | 29(1) | 18(1) | 36(1) | -1(1)  | 0(1)  | 10(1)  |
| C(16) | 32(1) | 14(1) | 35(1) | 4(1)   | 2(1)  | 5(1)   |
| C(17) | 22(1) | 15(1) | 22(1) | 3(1)   | 2(1)  | 3(1)   |
| C(18) | 15(1) | 10(1) | 19(1) | 0(1)   | 1(1)  | 2(1)   |
| C(19) | 14(1) | 14(1) | 24(1) | 0(1)   | 1(1)  | 0(1)   |
| C(20) | 12(1) | 18(1) | 43(1) | 6(1)   | 5(1)  | 3(1)   |

S12

|       |       |       |       |        |       |       |
|-------|-------|-------|-------|--------|-------|-------|
| C(21) | 16(1) | 35(1) | 57(1) | 9(1)   | 12(1) | -3(1) |
| C(22) | 21(1) | 39(1) | 42(1) | 9(1)   | -7(1) | 4(1)  |
| C(23) | 18(1) | 27(1) | 87(2) | -8(1)  | 10(1) | 8(1)  |
| C(24) | 16(1) | 14(1) | 24(1) | 4(1)   | 4(1)  | 1(1)  |
| N(3)  | 66(2) | 46(2) | 57(2) | 12(2)  | 31(2) | 16(2) |
| C(25) | 52(2) | 44(2) | 34(2) | 4(1)   | 11(2) | 19(2) |
| C(26) | 37(2) | 22(1) | 45(2) | 2(1)   | 9(1)  | 5(1)  |
| C(27) | 54(3) | 45(2) | 54(2) | -16(2) | 14(2) | 6(2)  |
| C(28) | 54(3) | 45(2) | 54(2) | -16(2) | 14(2) | 6(2)  |
| C(29) | 54(3) | 45(2) | 54(2) | -16(2) | 14(2) | 6(2)  |
| C(30) | 54(3) | 45(2) | 54(2) | -16(2) | 14(2) | 6(2)  |
| O(1)  | 54(3) | 45(2) | 54(2) | -16(2) | 14(2) | 6(2)  |

---

**Table 6.** Hydrogen coordinates ( $\times 10^4$ ) and isotropic displacement parameters ( $\text{\AA}^2 \times 10^3$ ) for  $[\text{Ni}(\text{P}^{\text{Cy}}_2\text{N}^{\text{t-Bu}}_2)](\text{BF}_4)_2$  (**1**).

|        | x     | y     | z    | U(eq) |
|--------|-------|-------|------|-------|
| H(1A)  | 10968 | 3135  | 7567 | 27    |
| H(1B)  | 11229 | 3202  | 6934 | 27    |
| H(2A)  | 10808 | 4806  | 7569 | 38    |
| H(2B)  | 11548 | 4601  | 7518 | 38    |
| H(3A)  | 11061 | 5797  | 6796 | 42    |
| H(3B)  | 11305 | 4902  | 6453 | 42    |
| H(4A)  | 10261 | 5331  | 5918 | 41    |
| H(4B)  | 9980  | 5260  | 6540 | 41    |
| H(5A)  | 10434 | 3654  | 5928 | 30    |
| H(5B)  | 9685  | 3859  | 5946 | 30    |
| H(6A)  | 9933  | 3709  | 7045 | 22    |
| H(7A)  | 10167 | 1554  | 5760 | 21    |
| H(7B)  | 10781 | 2144  | 6122 | 21    |
| H(9A)  | 8250  | -343  | 8149 | 46    |
| H(9B)  | 7857  | -387  | 8699 | 46    |
| H(9C)  | 8564  | -865  | 8785 | 46    |
| H(10A) | 9030  | 74    | 9719 | 46    |
| H(10B) | 8319  | 508   | 9700 | 46    |
| H(10C) | 8929  | 1207  | 9725 | 46    |
| H(11A) | 8094  | 1473  | 8155 | 47    |
| H(11B) | 8273  | 2013  | 8807 | 47    |
| H(11C) | 7691  | 1251  | 8682 | 47    |
| H(12A) | 9466  | -632  | 8669 | 19    |
| H(12B) | 9900  | 9     | 9200 | 19    |
| H(13A) | 11474 | -925  | 7988 | 23    |
| H(13B) | 10904 | -882  | 7381 | 23    |
| H(14A) | 10776 | -2561 | 7399 | 30    |
| H(14B) | 11524 | -2325 | 7397 | 30    |
| H(15A) | 11820 | -2596 | 8466 | 34    |
| H(15B) | 11434 | -3515 | 8151 | 34    |

S14

|        |       |       |       |    |
|--------|-------|-------|-------|----|
| H(16A) | 11059 | -3060 | 9059  | 33 |
| H(16B) | 10478 | -3017 | 8462  | 33 |
| H(17A) | 11189 | -1382 | 9033  | 24 |
| H(17B) | 10445 | -1620 | 9055  | 24 |
| H(18A) | 10152 | -1475 | 7959  | 18 |
| H(19A) | 10967 | 693   | 9216  | 21 |
| H(19B) | 11410 | 95    | 8841  | 21 |
| H(21A) | 7778  | 925   | 6956  | 53 |
| H(21B) | 7711  | 226   | 6372  | 53 |
| H(21C) | 7153  | 994   | 6403  | 53 |
| H(22A) | 8054  | 1879  | 5271  | 54 |
| H(22B) | 7324  | 1632  | 5333  | 54 |
| H(22C) | 7853  | 796   | 5372  | 54 |
| H(23A) | 7931  | 2694  | 6797  | 66 |
| H(23B) | 7296  | 2636  | 6254  | 66 |
| H(23C) | 7959  | 3073  | 6118  | 66 |
| H(24A) | 8924  | 2874  | 6374  | 21 |
| H(24B) | 9103  | 2250  | 5822  | 21 |
| H(25A) | 11513 | -4393 | 10304 | 65 |
| H(25B) | 11047 | -5308 | 10182 | 65 |
| H(25C) | 10799 | -4302 | 9879  | 65 |
| H(27A) | 12929 | -1420 | 10058 | 76 |
| H(27B) | 12601 | -1679 | 9357  | 76 |
| H(27C) | 13255 | -2208 | 9692  | 76 |
| H(28A) | 12054 | -2354 | 10069 | 61 |
| H(28B) | 12695 | -2872 | 10398 | 61 |
| H(29A) | 11157 | -4246 | 9884  | 61 |
| H(29B) | 11744 | -4820 | 10323 | 61 |
| H(30A) | 11301 | -5783 | 9413  | 76 |
| H(30B) | 12044 | -5515 | 9415  | 76 |
| H(30C) | 11467 | -4942 | 8979  | 76 |

---

## Theoretical Methods

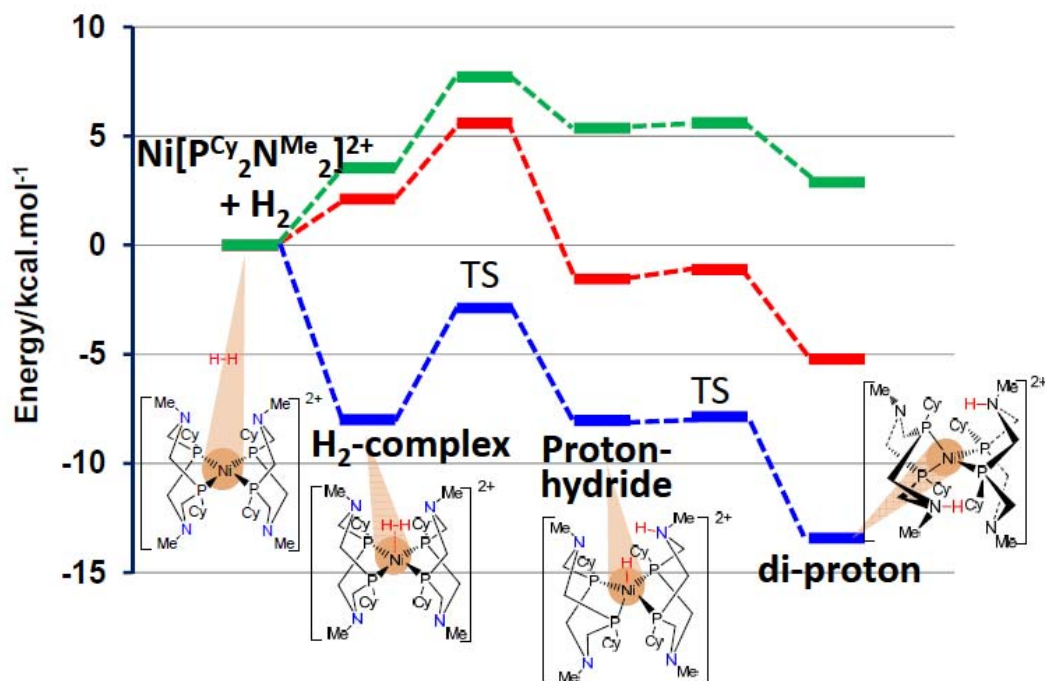

**Figure S1.** Reaction profile for all boat conformer. Blue is the gas phase energy included vdw correction; Green is gas phase free energy (gas phase energy plus ZPE, thermal correction and entropy term); Red is the free energy in acetonitrile solution ( gas phase free energy plus solvation free energy).

All structures were fully optimized without symmetry constraints using PBE<sup>2</sup> functional as implemented in Gaussian 09<sup>3</sup>. Stuttgart basis set with effective core potential (ECP)<sup>4</sup> was used for the Ni atom and a 6-31G\* basis set<sup>5</sup> was used for other non-metal atoms with a p-polarization function added onto H atoms. Each stationary point was confirmed by frequency calculation at the same level of theory to be real minimum without imaginary frequency, or transition state with only one imaginary frequency. The empirical long-range contribution calculated using Grimme scheme<sup>6</sup> as implemented in NWchem<sup>7</sup> was added to energy, gas phase free energy and free energy in solution. The gas phase free energy was corrected with ZPE, thermal corrections and entropy terms at 1 atm and 298K. The solvation free energy contribution to total free energy in acetonitrile was calculated by using the C-PCM model<sup>8</sup> in Gaussian 09 at the same level of theory as that for optimization. Bondi radii was used with a scale factor ( $\alpha$ ) of 1.0.



- 
1. R. A. Heintz, J. A. Smith, P. S. Szalay, A. Weisgerber, and K. R. Dunbar, *Inorg. Syn.*, 2002, **33**, 72.
  2. (a) J. P. Perdew, K. Burke, and M. Ernzerhof, *Phys. Rev. Lett.*, 1996, **77**, 3865. (b) J. P. Perdew, K. Burke, and M. Ernzerhof, *Phys. Rev. Lett.*, 1997, **78**, 1396.
  3. Gaussian 09, Revision A.01,  
M. J. Frisch, G. W. Trucks, H. B. Schlegel, G. E. Scuseria, M. A. Robb, J. R. Cheeseman, G. Scalmani, V. Barone, B. Mennucci, G. A. Petersson, H. Nakatsuji, M. Caricato, X. Li, H. P. Hratchian, A. F. Izmaylov, J. Bloino, G. Zheng, J. L. Sonnenberg, M. Hada, M. Ehara, K. Toyota, R. Fukuda, J. Hasegawa, M. Ishida, T. Nakajima, Y. Honda, O. Kitao, H. Nakai, T. Vreven, J. A. Montgomery, Jr., J. E. Peralta, F. Ogliaro, M. Bearpark, J. J. Heyd, E. Brothers, K. N. Kudin, V. N. Staroverov, R. Kobayashi, J. Normand, K. Raghavachari, A. Rendell, J. C. Burant, S. S. Iyengar, J. Tomasi, M. Cossi, N. Rega, J. M. Millam, M. Klene, J. E. Knox, J. B. Cross, V. Bakken, C. Adamo, J. Jaramillo, R. Gomperts, R. E. Stratmann, O. Yazyev, A. J. Austin, R. Cammi, C. Pomelli, J. W. Ochterski, R. L. Martin, K. Morokuma, V. G. Zakrzewski, G. A. Voth, P. Salvador, J. J. Dannenberg, S. Dapprich, A. D. Daniels, O. Farkas, J. B. Foresman, J. V. Ortiz, J. Cioslowski, and D. J. Fox, Gaussian, Inc., Wallingford CT, 2009.
  4. D. Andrae, U. Häußermann, M. Dolg, H. Stoll and H. Preuß, *Theor. Chem. Acc.*, 1990, **77**, 123.
  5. (a) M. M. Francl, W. J. Pietro, W. J. Hehre, J. S. Binkley, D. J. DeFrees, J. A. Pople, and M. S. Gordon, *J. Chem. Phys.*, 1982, **77**, 3654. (b) V. A. Rassolov, M. A. Ratner, J. A. Pople, P. C. Redfern, and L. A. Curtiss, *J. Comp. Chem.*, 2001, **22**, 976.
  6. S. Grimme, *J. Comp. Chem.* 2006, **27**, 1787.
  7. (a) T.P. Straatsma, E. Aprà, T.L. Windus, E.J. Bylaska, W. de Jong, S. Hirata, M. Valiev, M. Hackler, L. Pollack, R. Harrison, M. Dupuis, D.M.A. Smith, J. Nieplocha, V. Tipparaju, M. Krishnan, A.A. Auer, E. Brown, G. Cisneros, G. Fann, H. Früchtl, J. Garza, K. Hirao, R. Kendall, J. Nichols, K. Tsemekhman, K. Wolinski, J. Anchell, D. Bernholdt, P. Borowski, T. Clark, D. Clerc, H. Dachsel, M. Deegan, K. Dyall, D. Elwood, E. Glendening, M. Gutowski, A. Hess, J. Jaffe, B. Johnson, J. Ju, R. Kobayashi, R. Kutteh, Z. Lin, R. Littlefield, X. Long, B. Meng, T. Nakajima, S. Niu, M. Rosing, G. Sandrone, M. Stave, H. Taylor, G. Thomas, J. van Lenthe, A. Wong, Z. Zhang, *NWChem, A Computational Chemistry Package for Parallel Computers, Version 4.6* (2004), Pacific Northwest National Laboratory, Richland, Washington 99352-0999, USA. (b) *High Performance Computational Chemistry: an Overview of NWChem a Distributed Parallel Application*, R.A. Kendall, E. Aprà, D.E. Bernholdt, E.J. Bylaska, M. Dupuis, G.I. Fann, R.J. Harrison, J. Ju, J.A. Nichols, J. Nieplocha, T.P. Straatsma, T.L. Windus, A.T. Wong, *Computer Phys. Comm.*, 2000, **128**, 260-283.
  8. (a) V. Barone and M. Cossi, *J. Phys. Chem. A*, 1998, **102**, 1995. (b) V. Barone and M. Cossi, *J. Phys. Chem. A*, 1998, **102**, 1995.

---

***The Cartesian coordinates and energies of optimized structures of minima and transition states.***

The reported energies (in Hartree) include vdw dispersion correction calculated using Grimme scheme.

H<sub>2</sub>

E = -1.16466

|   |          |          |           |
|---|----------|----------|-----------|
| H | 0.000000 | 0.000000 | 0.374888  |
| H | 0.000000 | 0.000000 | -0.374888 |

[Ni(P<sub>2</sub><sup>Cy</sup>N<sub>2</sub><sup>Me</sup>)<sub>2</sub>]<sup>2+</sup>

E = -3167.41305

|    |           |           |          |
|----|-----------|-----------|----------|
| Ni | -0.000002 | 0.000000  | 0.000003 |
| P  | 1.381691  | -0.502187 | 1.679557 |
| P  | -1.381806 | 0.502140  | 1.679479 |
| N  | -0.828754 | -2.066200 | 2.475426 |
| N  | 0.828586  | 2.066130  | 2.475542 |
| C  | 0.499496  | -1.646080 | 2.913092 |
| H  | 1.131994  | -2.544872 | 2.992488 |
| H  | 0.503341  | -1.161854 | 3.918873 |
| C  | -1.828957 | -1.018004 | 2.666400 |
| H  | -1.969415 | -0.737897 | 3.738712 |
| H  | -2.802007 | -1.382336 | 2.290746 |
| C  | 1.828777  | 1.017929  | 2.666552 |
| H  | 1.969164  | 0.737790  | 3.738865 |
| H  | 2.801852  | 1.382273  | 2.290973 |
| C  | -0.499693 | 1.645998  | 2.913106 |
| H  | -1.132197 | 2.544787  | 2.992484 |
| H  | -0.503606 | 1.161744  | 3.918872 |
| C  | 2.998091  | -1.400296 | 1.358394 |
| H  | 3.542932  | -0.733654 | 0.660311 |
| C  | 3.870941  | -1.575600 | 2.623330 |
| H  | 4.067462  | -0.604010 | 3.111212 |
| H  | 3.340138  | -2.206466 | 3.362657 |
| C  | 5.207855  | -2.252408 | 2.252618 |
| H  | 5.792614  | -1.566646 | 1.608371 |

S18

---

|   |           |           |           |
|---|-----------|-----------|-----------|
| H | 5.802093  | -2.400525 | 3.170994  |
| C | 4.993136  | -3.587826 | 1.525020  |
| H | 5.965616  | -4.022848 | 1.237564  |
| H | 4.519250  | -4.312228 | 2.216002  |
| C | 4.101720  | -3.413353 | 0.285276  |
| H | 3.911809  | -4.389351 | -0.195501 |
| H | 4.629722  | -2.788555 | -0.463780 |
| C | 2.757725  | -2.749917 | 0.646184  |
| H | 2.200529  | -3.429904 | 1.320419  |
| H | 2.122527  | -2.612216 | -0.248528 |
| C | -2.998183 | 1.400263  | 1.358243  |
| H | -3.542982 | 0.733644  | 0.660104  |
| C | -2.757768 | 2.749906  | 0.646091  |
| H | -2.200614 | 3.429870  | 1.320385  |
| H | -2.122511 | 2.612233  | -0.248583 |
| C | -4.101737 | 3.413359  | 0.285119  |
| H | -3.911791 | 4.389371  | -0.195615 |
| H | -4.629693 | 2.788586  | -0.463992 |
| C | -4.993232 | 3.587795  | 1.524811  |
| H | -5.965692 | 4.022829  | 1.237307  |
| H | -4.519387 | 4.312174  | 2.215846  |
| C | -5.208001 | 2.252354  | 2.252352  |
| H | -5.792721 | 1.566614  | 1.608045  |
| H | -5.802297 | 2.400444  | 3.170695  |
| C | -3.871113 | 1.575531  | 2.623129  |
| H | -3.340353 | 2.206372  | 3.362508  |
| H | -4.067668 | 0.603927  | 3.110968  |
| C | -1.247828 | -3.310996 | 3.143873  |
| H | -2.227995 | -3.622134 | 2.746661  |
| H | -1.333880 | -3.204949 | 4.247007  |
| C | 1.247615  | 3.310906  | 3.144054  |
| H | 2.227809  | 3.622056  | 2.746917  |
| H | 1.333593  | 3.204826  | 4.247190  |
| P | 1.381801  | 0.502190  | -1.679458 |
| P | -1.381695 | -0.502139 | -1.679564 |
| N | -0.828595 | 2.066203  | -2.475468 |
| N | 0.828750  | -2.066127 | -2.475480 |
| C | 0.499685  | 1.646085  | -2.913048 |
| H | 1.132186  | 2.544879  | -2.992398 |
| H | 0.503597  | 1.161864  | -3.918831 |
| C | -1.828785 | 1.018007  | -2.666510 |
| H | -1.969174 | 0.737902  | -3.738832 |
| H | -2.801860 | 1.382338  | -2.290918 |
| C | 1.828953  | -1.017926 | -2.666423 |
| H | 1.969413  | -0.737788 | -3.738727 |

---

|   |           |           |           |
|---|-----------|-----------|-----------|
| H | 2.802003  | -1.382270 | -2.290778 |
| C | -0.499499 | -1.645992 | -2.913135 |
| H | -1.131996 | -2.544782 | -2.992560 |
| H | -0.503342 | -1.161735 | -3.918901 |
| C | 2.998179  | 1.400302  | -1.358198 |
| H | 3.542964  | 0.733679  | -0.660052 |
| C | 3.871129  | 1.575565  | -2.623071 |
| H | 4.067686  | 0.603959  | -3.110907 |
| H | 3.340386  | 2.206409  | -3.362460 |
| C | 5.208015  | 2.252381  | -2.252274 |
| H | 5.792721  | 1.566638  | -1.607958 |
| H | 5.802326  | 2.400467  | -3.170607 |
| C | 4.993242  | 3.587823  | -1.524736 |
| H | 5.965700  | 4.022851  | -1.237216 |
| H | 4.519413  | 4.312205  | -2.215779 |
| C | 4.101726  | 3.413393  | -0.285058 |
| H | 3.911778  | 4.389406  | 0.195672  |
| H | 4.629666  | 2.788617  | 0.464061  |
| C | 2.757759  | 2.749948  | -0.646053 |
| H | 2.200619  | 3.429912  | -1.320357 |
| H | 2.122485  | 2.612280  | 0.248610  |
| C | -2.998090 | -1.400267 | -1.358434 |
| H | -3.542940 | -0.733649 | -0.660336 |
| C | -2.757717 | -2.749909 | -0.646264 |
| H | -2.200514 | -3.429870 | -1.320519 |
| H | -2.122521 | -2.612232 | 0.248452  |
| C | -4.101708 | -3.413367 | -0.285382 |
| H | -3.911791 | -4.389378 | 0.195365  |
| H | -4.629717 | -2.788596 | 0.463693  |
| C | -4.993119 | -3.587807 | -1.525134 |
| H | -5.965598 | -4.022843 | -1.237695 |
| H | -4.519226 | -4.312185 | -2.216137 |
| C | -5.207844 | -2.252368 | -2.252692 |
| H | -5.792609 | -1.566629 | -1.608426 |
| H | -5.802077 | -2.400461 | -3.171075 |
| C | -3.870933 | -1.575541 | -2.623379 |
| H | -3.340122 | -2.206382 | -3.362721 |
| H | -4.067457 | -0.603938 | -3.111234 |
| C | -1.247626 | 3.311000  | -3.143940 |
| H | -2.227819 | 3.622136  | -2.746791 |
| H | -1.333605 | 3.204955  | -4.247079 |
| C | 1.247824  | -3.310902 | -3.143964 |
| H | 2.227991  | -3.622053 | -2.746761 |
| H | 1.333877  | -3.204822 | -4.247095 |
| H | 0.520573  | -4.108077 | -2.921118 |

---

|   |           |           |           |
|---|-----------|-----------|-----------|
| H | -0.520391 | 4.108168  | -2.921018 |
| H | 0.520380  | 4.108081  | 2.921157  |
| H | -0.520578 | -4.108164 | 2.921002  |

$[\text{H}_2\text{Ni}(\text{P}_2^{\text{Cy}}\text{N}_2^{\text{Me}})_2]^{2+}$  dihydrogen adduct

E = -3168.59044

|    |           |           |           |
|----|-----------|-----------|-----------|
| Ni | -0.000145 | 0.000821  | -0.281670 |
| P  | 1.320461  | 1.662588  | 0.498689  |
| P  | -1.452965 | 1.706948  | -0.476452 |
| N  | -0.870416 | 2.288609  | 2.166653  |
| N  | 0.680788  | 2.653727  | -2.029497 |
| C  | 0.547031  | 2.551982  | 1.970693  |
| H  | 1.087155  | 2.188367  | 2.860902  |
| H  | 0.774292  | 3.641833  | 1.865890  |
| C  | -1.671900 | 2.776883  | 1.056591  |
| H  | -1.468712 | 3.842728  | 0.788239  |
| H  | -2.737977 | 2.712675  | 1.335820  |
| C  | 1.486266  | 2.976874  | -0.857358 |
| H  | 1.267694  | 3.986073  | -0.434880 |
| H  | 2.546579  | 2.975883  | -1.162668 |
| C  | -0.741328 | 2.852280  | -1.796884 |
| H  | -1.279854 | 2.625710  | -2.733286 |
| H  | -0.996763 | 3.900554  | -1.510421 |
| C  | 3.108717  | 1.505696  | 1.085208  |
| H  | 3.641168  | 1.125092  | 0.190204  |
| C  | 3.749854  | 2.861750  | 1.472208  |
| H  | 3.650347  | 3.607210  | 0.663503  |
| H  | 3.235170  | 3.277598  | 2.359240  |
| C  | 5.243738  | 2.660547  | 1.805733  |
| H  | 5.778135  | 2.339566  | 0.889720  |
| H  | 5.680734  | 3.631205  | 2.098170  |
| C  | 5.447205  | 1.619974  | 2.916500  |
| H  | 6.524398  | 1.462434  | 3.097001  |
| H  | 5.024935  | 2.006774  | 3.864459  |
| C  | 4.766453  | 0.287529  | 2.566777  |
| H  | 4.863916  | -0.427881 | 3.402775  |
| H  | 5.278388  | -0.172248 | 1.696554  |
| C  | 3.275049  | 0.490581  | 2.233317  |
| H  | 2.759543  | 0.869294  | 3.137634  |
| H  | 2.781292  | -0.465629 | 1.988495  |
| C  | -3.209277 | 1.430814  | -1.084418 |
| H  | -3.711772 | 0.949492  | -0.222343 |
| C  | -3.273886 | 0.473578  | -2.292123 |

---

|   |           |           |           |
|---|-----------|-----------|-----------|
| H | -2.751834 | 0.929992  | -3.156693 |
| H | -2.739323 | -0.469098 | -2.070601 |
| C | -4.738465 | 0.193030  | -2.685286 |
| H | -4.760711 | -0.465580 | -3.571379 |
| H | -5.234922 | -0.363994 | -1.864858 |
| C | -5.508807 | 1.493849  | -2.959490 |
| H | -6.564772 | 1.268746  | -3.187255 |
| H | -5.092330 | 1.983071  | -3.861637 |
| C | -5.419142 | 2.458370  | -1.768155 |
| H | -5.942740 | 2.023988  | -0.893710 |
| H | -5.929920 | 3.409585  | -1.997917 |
| C | -3.954409 | 2.755615  | -1.383507 |
| H | -3.462785 | 3.282019  | -2.223545 |
| H | -3.927249 | 3.437815  | -0.514657 |
| C | -1.334179 | 2.838223  | 3.451794  |
| H | -2.390632 | 2.563095  | 3.605987  |
| H | -1.245076 | 3.944832  | 3.511678  |
| C | 1.133663  | 3.378238  | -3.229964 |
| H | 2.192840  | 3.140094  | -3.419742 |
| H | 1.030179  | 4.480398  | -3.137474 |
| P | 1.452328  | -1.705568 | -0.476828 |
| P | -1.320471 | -1.660789 | 0.499800  |
| N | -0.682280 | -2.652585 | -2.028511 |
| N | 0.871274  | -2.286515 | 2.166730  |
| C | 0.739991  | -2.851036 | -1.796741 |
| H | 1.277941  | -2.624495 | -2.733482 |
| H | 0.995668  | -3.899273 | -1.510355 |
| C | -1.486990 | -2.975475 | -0.855780 |
| H | -1.268051 | -3.984533 | -0.433155 |
| H | -2.547505 | -2.974675 | -1.160402 |
| C | 1.671976  | -2.775220 | 1.056302  |
| H | 1.468383  | -3.841079 | 0.788315  |
| H | 2.738238  | -2.711176 | 1.334858  |
| C | -0.546323 | -2.549731 | 1.971696  |
| H | -1.085880 | -2.185682 | 2.862076  |
| H | -0.773821 | -3.639583 | 1.867432  |
| C | 3.208382  | -1.429660 | -1.085632 |
| H | 3.708444  | -0.938544 | -0.227675 |
| C | 3.958071  | -2.754833 | -1.371350 |
| H | 3.932081  | -3.428888 | -0.496131 |
| H | 3.469095  | -3.290708 | -2.206937 |
| C | 5.422294  | -2.456540 | -1.757147 |
| H | 5.943510  | -2.012308 | -0.886234 |
| H | 5.936352  | -3.408238 | -1.977397 |
| C | 5.510281  | -1.502961 | -2.957394 |

---

|   |           |           |           |
|---|-----------|-----------|-----------|
| H | 6.565787  | -1.276567 | -3.186003 |
| H | 5.096505  | -2.001999 | -3.855396 |
| C | 4.735379  | -0.202135 | -2.696369 |
| H | 4.756570  | 0.448190  | -3.588586 |
| H | 5.229008  | 0.364189  | -1.880614 |
| C | 3.271249  | -0.483786 | -2.302340 |
| H | 2.751824  | -0.950209 | -3.163141 |
| H | 2.733248  | 0.459160  | -2.090500 |
| C | -3.108448 | -1.503978 | 1.087214  |
| H | -3.640968 | -1.121275 | 0.193140  |
| C | -3.273887 | -0.491187 | 2.237486  |
| H | -2.758492 | -0.872195 | 3.140904  |
| H | -2.779517 | 0.465191  | 1.994644  |
| C | -4.765105 | -0.287861 | 2.571597  |
| H | -4.861993 | 0.425929  | 3.409046  |
| H | -5.276893 | 0.173975  | 1.702377  |
| C | -5.446611 | -1.620595 | 2.918749  |
| H | -6.523676 | -1.462764 | 3.099752  |
| H | -5.024415 | -2.009555 | 3.865856  |
| C | -5.243962 | -2.659069 | 1.805864  |
| H | -5.778376 | -2.335975 | 0.890606  |
| H | -5.681437 | -3.630061 | 2.096467  |
| C | -3.750259 | -2.860450 | 1.471616  |
| H | -3.235638 | -3.278385 | 2.357699  |
| H | -3.651332 | -3.604324 | 0.661372  |
| C | -1.135884 | -3.377397 | -3.228520 |
| H | -2.195188 | -3.139336 | -3.417692 |
| H | -1.032301 | -4.479531 | -3.135832 |
| C | 1.335738  | -2.835836 | 3.451742  |
| H | 2.392326  | -2.560823 | 3.605215  |
| H | 1.246504  | -3.942414 | 3.511993  |
| H | 0.744679  | -2.392757 | 4.269492  |
| H | -0.548452 | -3.042425 | -4.098893 |
| H | 0.545675  | 3.043080  | -4.099889 |
| H | -0.742556 | 2.395465  | 4.269309  |
| H | 0.245797  | 0.330469  | -2.010225 |
| H | -0.247151 | -0.329262 | -2.009995 |

$[\text{H}_2\text{Ni}(\text{P}_2^{\text{Cy}}\text{N}_2^{\text{Me}})_2]^{2+}$  Transition state between  $\text{H}_2$ -adduct and first proton-hydride

---

E = -3168.58229

|    |           |           |           |
|----|-----------|-----------|-----------|
| Ni | 0.004452  | -0.292240 | -0.089761 |
| P  | 1.190775  | 1.041249  | -1.501652 |
| P  | -1.556049 | -0.127742 | -1.645392 |
| N  | -1.106514 | 2.625813  | -1.814236 |
| N  | 0.652186  | -1.279438 | -2.929346 |
| C  | 0.217999  | 2.408426  | -2.384645 |
| H  | 0.798546  | 3.335398  | -2.245933 |
| H  | 0.199365  | 2.207368  | -3.483872 |
| C  | -2.064786 | 1.594302  | -2.181741 |
| H  | -2.273625 | 1.560322  | -3.280305 |
| H  | -3.024804 | 1.810842  | -1.678315 |
| C  | 1.605657  | -0.150436 | -2.918956 |
| H  | 1.628274  | 0.362144  | -3.900950 |
| H  | 2.610949  | -0.562766 | -2.725555 |
| C  | -0.730390 | -0.860700 | -3.204887 |
| H  | -1.309959 | -1.748306 | -3.503727 |
| H  | -0.780569 | -0.125377 | -4.030079 |
| C  | 2.855410  | 1.851367  | -1.159848 |
| H  | 3.447798  | 1.035707  | -0.693724 |
| C  | 3.611285  | 2.340530  | -2.415103 |
| H  | 3.750601  | 1.523656  | -3.146431 |
| H  | 3.020179  | 3.128262  | -2.922175 |
| C  | 4.986317  | 2.920391  | -2.020486 |
| H  | 5.619613  | 2.104475  | -1.619415 |
| H  | 5.495182  | 3.293959  | -2.926058 |
| C  | 4.858057  | 4.035681  | -0.972329 |
| H  | 5.858769  | 4.397070  | -0.679462 |
| H  | 4.331645  | 4.901841  | -1.418957 |
| C  | 4.082153  | 3.554674  | 0.263767  |
| H  | 3.950178  | 4.381746  | 0.983807  |
| H  | 4.668940  | 2.771365  | 0.785810  |
| C  | 2.702842  | 2.985272  | -0.122455 |
| H  | 2.096596  | 3.803679  | -0.559544 |
| H  | 2.148162  | 2.625481  | 0.763013  |
| C  | -3.170933 | -1.074975 | -1.514070 |
| H  | -3.691845 | -0.590542 | -0.662624 |
| C  | -2.919052 | -2.552348 | -1.143295 |
| H  | -2.371387 | -3.052160 | -1.968457 |
| H  | -2.271097 | -2.622682 | -0.249933 |
| C  | -4.254443 | -3.290467 | -0.923896 |
| H  | -4.052843 | -4.351130 | -0.692174 |
| H  | -4.763533 | -2.863959 | -0.036260 |
| C  | -5.173898 | -3.169818 | -2.149013 |



---

|   |           |           |           |
|---|-----------|-----------|-----------|
| H | -6.138931 | -3.666991 | -1.951311 |
| H | -4.716778 | -3.705049 | -3.004431 |
| C | -5.406689 | -1.700663 | -2.530096 |
| H | -5.973724 | -1.192189 | -1.725842 |
| H | -6.024172 | -1.627273 | -3.442092 |
| C | -4.078722 | -0.948462 | -2.760872 |
| H | -3.568180 | -1.384280 | -3.642255 |
| H | -4.286154 | 0.109963  | -2.999528 |
| C | -1.632484 | 3.960173  | -2.149048 |
| H | -2.596496 | 4.110989  | -1.635522 |
| H | -1.789994 | 4.105822  | -3.239986 |
| C | 1.102046  | -2.417640 | -3.760724 |
| H | 2.109765  | -2.722443 | -3.437857 |
| H | 1.135142  | -2.154505 | -4.834025 |
| P | 1.472463  | -1.001073 | 1.401764  |
| P | -1.182792 | 0.123051  | 1.762368  |
| N | -0.726248 | -2.595610 | 2.107165  |
| N | 1.110177  | 1.428488  | 2.722277  |
| C | 0.655121  | -2.328382 | 2.484715  |
| H | 1.236623  | -3.253162 | 2.331889  |
| H | 0.781241  | -2.040000 | 3.556099  |
| C | -1.641564 | -1.535681 | 2.520196  |
| H | -1.704773 | -1.424045 | 3.629785  |
| H | -2.653689 | -1.791403 | 2.157866  |
| C | 2.048898  | 0.324087  | 2.596429  |
| H | 2.263174  | -0.174235 | 3.574286  |
| H | 3.007628  | 0.714108  | 2.208750  |
| C | -0.207232 | 0.975534  | 3.147316  |
| H | -0.794619 | 1.859722  | 3.442868  |
| H | -0.176497 | 0.298900  | 4.035404  |
| C | 3.098935  | -1.782748 | 0.854469  |
| H | 3.601519  | -0.972567 | 0.286011  |
| C | 3.999331  | -2.159447 | 2.059280  |
| H | 4.176637  | -1.288750 | 2.713896  |
| H | 3.492846  | -2.928081 | 2.674929  |
| C | 5.351794  | -2.720638 | 1.573057  |
| H | 5.910873  | -1.918853 | 1.051901  |
| H | 5.956914  | -3.003552 | 2.451865  |
| C | 5.167129  | -3.918050 | 0.631988  |
| H | 6.147017  | -4.273469 | 0.269987  |
| H | 4.714660  | -4.761337 | 1.189459  |
| C | 4.266307  | -3.549323 | -0.555384 |
| H | 4.094724  | -4.428278 | -1.201589 |
| H | 4.775902  | -2.789348 | -1.181445 |
| C | 2.907873  | -2.989899 | -0.086064 |

---

|   |           |           |           |
|---|-----------|-----------|-----------|
| H | 2.352616  | -3.790312 | 0.441716  |
| H | 2.292982  | -2.706287 | -0.958149 |
| C | -2.801446 | 1.086704  | 1.764433  |
| H | -3.400704 | 0.605271  | 0.964860  |
| C | -2.577612 | 2.564342  | 1.377241  |
| H | -1.981884 | 3.064479  | 2.166141  |
| H | -1.986075 | 2.640039  | 0.446684  |
| C | -3.926930 | 3.299896  | 1.253733  |
| H | -3.746289 | 4.359579  | 0.999305  |
| H | -4.507201 | 2.866852  | 0.412774  |
| C | -4.747086 | 3.189945  | 2.548515  |
| H | -5.727150 | 3.681971  | 2.424889  |
| H | -4.223548 | 3.735554  | 3.357806  |
| C | -4.940975 | 1.724086  | 2.962904  |
| H | -5.575044 | 1.207080  | 2.215618  |
| H | -5.478297 | 1.659646  | 3.925068  |
| C | -3.597359 | 0.973558  | 3.085424  |
| H | -3.010747 | 1.416063  | 3.914106  |
| H | -3.787412 | -0.080727 | 3.353468  |
| C | -1.181831 | -3.905209 | 2.601250  |
| H | -2.202230 | -4.096200 | 2.229897  |
| H | -1.195356 | -3.974550 | 3.710804  |
| C | 1.646364  | 2.462219  | 3.623659  |
| H | 2.616910  | 2.815204  | 3.237078  |
| H | 1.795907  | 2.098061  | 4.663590  |
| H | 0.954782  | 3.319877  | 3.646321  |
| H | -0.521605 | -4.695300 | 2.207661  |
| H | 0.413153  | -3.265186 | -3.617019 |
| H | -0.929784 | 4.728781  | -1.788966 |
| H | 0.472774  | -1.573355 | -1.465550 |
| H | 0.150080  | -1.824724 | -0.592714 |

$[\text{H}_2\text{Ni}(\text{P}_2^{\text{Cy}}\text{N}_2^{\text{Me}})_2]^{2+}$  first proton-dydride

E = -3168.58958

|    |           |           |           |
|----|-----------|-----------|-----------|
| Ni | 0.024869  | -0.277618 | -0.068099 |
| P  | -1.469336 | -0.457178 | -1.632138 |
| P  | 1.153854  | 0.984146  | -1.558921 |
| N  | 0.854184  | -1.530513 | -2.783691 |
| N  | -1.251775 | 2.303432  | -2.126827 |
| C  | -0.599100 | -1.298201 | -3.106218 |
| H  | -1.057490 | -2.285341 | -3.274220 |
| H  | -0.665651 | -0.712884 | -4.037027 |
| C  | 1.689378  | -0.278235 | -2.883214 |

---

|   |           |           |           |
|---|-----------|-----------|-----------|
| H | 1.623614  | 0.095604  | -3.918378 |
| H | 2.730160  | -0.579633 | -2.680604 |
| C | -2.086998 | 1.146564  | -2.405014 |
| H | -2.240159 | 0.969416  | -3.499392 |
| H | -3.085951 | 1.328978  | -1.968181 |
| C | 0.113784  | 2.172843  | -2.613522 |
| H | 0.595162  | 3.161328  | -2.526826 |
| H | 0.174209  | 1.885339  | -3.692583 |
| C | -3.035771 | -1.469493 | -1.433543 |
| H | -3.592896 | -0.894628 | -0.662890 |
| C | -3.911374 | -1.548871 | -2.705817 |
| H | -4.153718 | -0.542505 | -3.091138 |
| H | -3.356228 | -2.075702 | -3.508008 |
| C | -5.214441 | -2.321958 | -2.414506 |
| H | -5.826235 | -1.738923 | -1.698606 |
| H | -5.805956 | -2.395334 | -3.343553 |
| C | -4.933327 | -3.716782 | -1.837558 |
| H | -5.882624 | -4.227329 | -1.601286 |
| H | -4.427582 | -4.337808 | -2.603170 |
| C | -4.049269 | -3.633665 | -0.583907 |
| H | -3.811853 | -4.644209 | -0.207362 |
| H | -4.603820 | -3.117782 | 0.225471  |
| C | -2.738089 | -2.870334 | -0.858788 |
| H | -2.140177 | -3.451082 | -1.592491 |
| H | -2.124660 | -2.785248 | 0.057079  |
| C | 2.771968  | 1.924063  | -1.327539 |
| H | 3.417192  | 1.190435  | -0.797333 |
| C | 2.543419  | 3.126307  | -0.384957 |
| H | 1.871956  | 3.857146  | -0.879005 |
| H | 2.031300  | 2.794353  | 0.536385  |
| C | 3.878126  | 3.828515  | -0.067556 |
| H | 3.688024  | 4.700913  | 0.582409  |
| H | 4.525285  | 3.138301  | 0.511063  |
| C | 4.608137  | 4.259946  | -1.348684 |
| H | 5.580132  | 4.719589  | -1.100092 |
| H | 4.014784  | 5.042047  | -1.861715 |
| C | 4.815661  | 3.071178  | -2.298732 |
| H | 5.509922  | 2.342557  | -1.835436 |
| H | 5.290940  | 3.401795  | -3.238668 |
| C | 3.485671  | 2.359427  | -2.626113 |
| H | 2.835346  | 3.055381  | -3.191571 |
| H | 3.684511  | 1.497368  | -3.289785 |
| C | 1.441618  | -2.679681 | -3.546799 |
| H | 2.478725  | -2.834457 | -3.214847 |
| H | 1.423498  | -2.451410 | -4.622722 |

---

|   |           |           |           |
|---|-----------|-----------|-----------|
| C | -1.891557 | 3.533663  | -2.621743 |
| H | -2.888238 | 3.637998  | -2.162040 |
| H | -2.012017 | 3.547001  | -3.727141 |
| P | -1.142616 | 0.471918  | 1.726929  |
| P | 1.405018  | -0.953746 | 1.477210  |
| N | 1.262322  | 1.646015  | 2.549547  |
| N | -0.910877 | -2.243760 | 2.393064  |
| C | -0.096890 | 1.385464  | 3.013873  |
| H | -0.585432 | 2.358253  | 3.188995  |
| H | -0.131951 | 0.830242  | 3.982054  |
| C | 2.091549  | 0.449677  | 2.529307  |
| H | 2.274101  | 0.035301  | 3.551923  |
| H | 3.076823  | 0.715740  | 2.104383  |
| C | -1.717205 | -1.057065 | 2.670538  |
| H | -1.760480 | -0.815762 | 3.760246  |
| H | -2.752306 | -1.264240 | 2.343203  |
| C | 0.496924  | -2.064369 | 2.716028  |
| H | 0.986872  | -3.052056 | 2.672508  |
| H | 0.673412  | -1.661971 | 3.742343  |
| C | -2.722841 | 1.501128  | 1.657571  |
| H | -3.359504 | 0.947441  | 0.933792  |
| C | -3.484365 | 1.590638  | 2.999704  |
| H | -3.713231 | 0.588270  | 3.402080  |
| H | -2.850149 | 2.100550  | 3.751332  |
| C | -4.794986 | 2.386583  | 2.826495  |
| H | -5.476584 | 1.818656  | 2.162563  |
| H | -5.303660 | 2.463318  | 3.803295  |
| C | -4.545137 | 3.781172  | 2.234749  |
| H | -5.503402 | 4.306959  | 2.081673  |
| H | -3.966372 | 4.389518  | 2.957149  |
| C | -3.767401 | 3.691234  | 0.913019  |
| H | -3.547134 | 4.701335  | 0.523696  |
| H | -4.397893 | 3.188814  | 0.150479  |
| C | -2.451236 | 2.906423  | 1.081216  |
| H | -1.796610 | 3.467935  | 1.777371  |
| H | -1.906448 | 2.827447  | 0.123417  |
| C | 2.973596  | -1.908624 | 1.049312  |
| H | 3.518087  | -1.218371 | 0.369391  |
| C | 2.685706  | -3.217013 | 0.286633  |
| H | 2.107519  | -3.905415 | 0.933823  |
| H | 2.043851  | -3.020177 | -0.593400 |
| C | 3.991229  | -3.913689 | -0.143659 |
| H | 3.751524  | -4.855785 | -0.668030 |
| H | 4.527303  | -3.269736 | -0.870623 |
| C | 4.902279  | -4.185081 | 1.063058  |

---

|   |           |           |           |
|---|-----------|-----------|-----------|
| H | 5.850072  | -4.640736 | 0.728846  |
| H | 4.416390  | -4.925430 | 1.728064  |
| C | 5.179449  | -2.895053 | 1.846483  |
| H | 5.776387  | -2.201170 | 1.222315  |
| H | 5.786271  | -3.108123 | 2.743528  |
| C | 3.876062  | -2.190844 | 2.276918  |
| H | 3.333397  | -2.840100 | 2.991635  |
| H | 4.122312  | -1.259134 | 2.814242  |
| C | 1.909239  | 2.698724  | 3.350141  |
| H | 2.908305  | 2.913690  | 2.935188  |
| H | 2.029006  | 2.420031  | 4.420176  |
| C | -1.474398 | -3.423541 | 3.067463  |
| H | -2.515631 | -3.568471 | 2.734383  |
| H | -1.473501 | -3.336782 | 4.176302  |
| H | -0.896784 | -4.319407 | 2.785706  |
| H | 1.308379  | 3.621068  | 3.293290  |
| H | -1.285262 | 4.404501  | -2.324035 |
| H | 0.847715  | -3.583245 | -3.344168 |
| H | 0.040289  | -1.785656 | -0.208530 |
| H | 0.831235  | -1.734890 | -1.728848 |

$[\text{H}_2\text{Ni}(\text{P}_2^{\text{Cy}}\text{N}_2^{\text{Me}})_2]^{2+}$  Transition state between 1st proton-hydride and 2nd proton-hydride

E = -3168.58820

|    |           |           |           |
|----|-----------|-----------|-----------|
| Ni | 0.004567  | -0.264204 | -0.068766 |
| P  | 1.054359  | 0.925673  | -1.642355 |
| P  | -1.454232 | -0.719183 | -1.607720 |
| N  | -1.444678 | 1.999491  | -2.316995 |
| N  | 0.952354  | -1.715006 | -2.601408 |
| C  | -0.064535 | 1.959745  | -2.774284 |
| H  | 0.332657  | 2.987865  | -2.736051 |
| H  | 0.042605  | 1.616482  | -3.833245 |
| C  | -2.164960 | 0.757627  | -2.541560 |
| H  | -2.248041 | 0.486923  | -3.624394 |
| H  | -3.195323 | 0.884047  | -2.163015 |
| C  | 1.670379  | -0.412419 | -2.853847 |
| H  | 1.548155  | -0.152214 | -3.917854 |
| H  | 2.737969  | -0.598573 | -2.653142 |
| C  | -0.509775 | -1.659445 | -2.970331 |
| H  | -0.875339 | -2.697316 | -3.012809 |
| H  | -0.604887 | -1.205810 | -3.969693 |
| C  | 2.610709  | 1.981209  | -1.503771 |
| H  | 3.304077  | 1.338050  | -0.920265 |
| C  | 3.280203  | 2.339422  | -2.849781 |

---

|   |           |           |           |
|---|-----------|-----------|-----------|
| H | 3.524314  | 1.435487  | -3.438204 |
| H | 2.580880  | 2.941152  | -3.462781 |
| C | 4.568136  | 3.156579  | -2.612740 |
| H | 5.311405  | 2.516704  | -2.097378 |
| H | 5.009959  | 3.426265  | -3.587801 |
| C | 4.299501  | 4.413126  | -1.771890 |
| H | 5.244451  | 4.951019  | -1.583153 |
| H | 3.653227  | 5.107868  | -2.343371 |
| C | 3.613567  | 4.056650  | -0.444767 |
| H | 3.378178  | 4.970835  | 0.128241  |
| H | 4.309486  | 3.462348  | 0.181605  |
| C | 2.320153  | 3.248918  | -0.670697 |
| H | 1.597528  | 3.889912  | -1.214704 |
| H | 1.850438  | 2.967989  | 0.288886  |
| C | -2.966336 | -1.796145 | -1.324922 |
| H | -3.564667 | -1.181993 | -0.617997 |
| C | -2.613428 | -3.123414 | -0.622981 |
| H | -1.973560 | -3.737673 | -1.290762 |
| H | -2.027901 | -2.927957 | 0.293670  |
| C | -3.888998 | -3.924413 | -0.293720 |
| H | -3.607218 | -4.881616 | 0.179150  |
| H | -4.482066 | -3.364019 | 0.456346  |
| C | -4.745337 | -4.169111 | -1.545012 |
| H | -5.672688 | -4.702109 | -1.273779 |
| H | -4.196650 | -4.832686 | -2.242272 |
| C | -5.082923 | -2.849461 | -2.252664 |
| H | -5.735921 | -2.234560 | -1.602939 |
| H | -5.652199 | -3.037470 | -3.179466 |
| C | -3.813936 | -2.041603 | -2.596372 |
| H | -3.216925 | -2.613024 | -3.335637 |
| H | -4.099485 | -1.091272 | -3.080972 |
| C | -2.177388 | 3.138314  | -2.895032 |
| H | -3.188097 | 3.182281  | -2.456928 |
| H | -2.275846 | 3.077094  | -4.000971 |
| C | 1.659622  | -2.892086 | -3.203924 |
| H | 2.694185  | -2.915953 | -2.831227 |
| H | 1.657906  | -2.796762 | -4.299723 |
| P | 1.437828  | -0.854706 | 1.481476  |
| P | -1.085185 | 0.718315  | 1.700114  |
| N | -0.901666 | -1.947609 | 2.569750  |
| N | 1.404492  | 1.832703  | 2.353376  |
| C | 0.514392  | -1.779007 | 2.861159  |
| H | 0.971966  | -2.779438 | 2.939592  |
| H | 0.709764  | -1.258330 | 3.826373  |
| C | -1.678706 | -0.722469 | 2.767027  |

---

|   |           |           |           |
|---|-----------|-----------|-----------|
| H | -1.698898 | -0.408310 | 3.836853  |
| H | -2.722563 | -0.930918 | 2.469808  |
| C | 2.203261  | 0.614295  | 2.378478  |
| H | 2.434436  | 0.275090  | 3.418652  |
| H | 3.170596  | 0.823186  | 1.885164  |
| C | 0.054108  | 1.659645  | 2.885752  |
| H | -0.382047 | 2.664269  | 3.015341  |
| H | 0.036559  | 1.174287  | 3.890911  |
| C | 2.950268  | -1.932866 | 1.147219  |
| H | 3.501385  | -1.368775 | 0.363784  |
| C | 3.891456  | -2.113564 | 2.362862  |
| H | 4.213532  | -1.138002 | 2.765681  |
| H | 3.347681  | -2.633125 | 3.176235  |
| C | 5.132262  | -2.943952 | 1.973946  |
| H | 5.737970  | -2.368649 | 1.246234  |
| H | 5.767283  | -3.084144 | 2.865789  |
| C | 4.749134  | -4.300670 | 1.366721  |
| H | 5.654344  | -4.849126 | 1.054645  |
| H | 4.255269  | -4.924960 | 2.136706  |
| C | 3.797685  | -4.126381 | 0.172654  |
| H | 3.484730  | -5.110026 | -0.220327 |
| H | 4.332773  | -3.608196 | -0.649778 |
| C | 2.554612  | -3.307098 | 0.568653  |
| H | 1.980300  | -3.876475 | 1.325535  |
| H | 1.871575  | -3.186388 | -0.295151 |
| C | -2.631271 | 1.797603  | 1.644182  |
| H | -3.328075 | 1.208619  | 1.009135  |
| C | -2.346914 | 3.133025  | 0.924520  |
| H | -1.617461 | 3.722122  | 1.516040  |
| H | -1.884306 | 2.936150  | -0.059234 |
| C | -3.638191 | 3.961563  | 0.774529  |
| H | -3.404487 | 4.924201  | 0.285577  |
| H | -4.337312 | 3.426206  | 0.099863  |
| C | -4.322031 | 4.197098  | 2.129962  |
| H | -5.264946 | 4.753961  | 1.991868  |
| H | -3.671997 | 4.834348  | 2.761275  |
| C | -4.591479 | 2.869317  | 2.852374  |
| H | -5.335417 | 2.280324  | 2.280113  |
| H | -5.035100 | 3.050096  | 3.847054  |
| C | -3.305206 | 2.033328  | 3.014183  |
| H | -2.606812 | 2.575419  | 3.681895  |
| H | -3.547088 | 1.078258  | 3.513142  |
| C | -1.493832 | -3.074816 | 3.306589  |
| H | -2.537432 | -3.213871 | 2.978630  |
| H | -1.493800 | -2.923986 | 4.407692  |

---

|   |           |           |           |
|---|-----------|-----------|-----------|
| C | 2.118380  | 2.911754  | 3.056380  |
| H | 3.106471  | 3.063624  | 2.590405  |
| H | 2.272362  | 2.699199  | 4.137275  |
| H | 1.547020  | 3.849846  | 2.962607  |
| H | -0.935447 | -3.997833 | 3.079046  |
| H | 1.136403  | -3.812860 | -2.906554 |
| H | -1.654819 | 4.074757  | -2.640670 |
| H | 0.930482  | -1.770494 | -1.526788 |
| H | -0.373926 | -1.643964 | 0.348509  |

$[\text{H}_2\text{Ni}(\text{P}_2^{\text{Cy}}\text{N}_2^{\text{Me}})_2]^{2+}$  Second proton-hydride

E = -3168.59050

|    |           |           |           |
|----|-----------|-----------|-----------|
| Ni | -0.204700 | 0.120971  | 0.018376  |
| P  | 0.982340  | -0.640391 | -1.718235 |
| P  | -0.983546 | 1.611241  | -1.352793 |
| N  | 1.662391  | 2.050911  | -2.146171 |
| N  | -1.688633 | -0.800157 | -2.572182 |
| C  | 1.757778  | 0.741239  | -2.772412 |
| H  | 2.826986  | 0.487876  | -2.865335 |
| H  | 1.336525  | 0.711776  | -3.807985 |
| C  | 0.331855  | 2.632817  | -2.233792 |
| H  | 0.006045  | 2.820647  | -3.287699 |
| H  | 0.347638  | 3.612152  | -1.722202 |
| C  | -0.321508 | -1.336678 | -2.914001 |
| H  | -0.125323 | -1.118309 | -3.976457 |
| H  | -0.368597 | -2.429403 | -2.777083 |
| C  | -1.806563 | 0.687272  | -2.809344 |
| H  | -2.880278 | 0.928861  | -2.838128 |
| H  | -1.363773 | 0.920471  | -3.790709 |
| C  | 2.268820  | -2.019592 | -1.820833 |
| H  | 1.795371  | -2.851998 | -1.260235 |
| C  | 2.585769  | -2.484832 | -3.261110 |
| H  | 1.674169  | -2.819436 | -3.789542 |
| H  | 3.000009  | -1.638181 | -3.843318 |
| C  | 3.616090  | -3.633326 | -3.253642 |
| H  | 3.163530  | -4.522172 | -2.771734 |
| H  | 3.842624  | -3.922139 | -4.294799 |
| C  | 4.897724  | -3.239658 | -2.506684 |
| H  | 5.600869  | -4.089892 | -2.484662 |
| H  | 5.409495  | -2.424449 | -3.054986 |
| C  | 4.579151  | -2.775537 | -1.078202 |
| H  | 5.499259  | -2.451177 | -0.560376 |
| H  | 4.172461  | -3.626629 | -0.497376 |



---

|   |           |           |           |
|---|-----------|-----------|-----------|
| C | 3.555882  | -1.622459 | -1.067362 |
| H | 4.017657  | -0.737738 | -1.549007 |
| H | 3.299564  | -1.338627 | -0.033163 |
| C | -2.280861 | 2.896901  | -0.916409 |
| H | -1.765811 | 3.493584  | -0.133608 |
| C | -3.527113 | 2.251280  | -0.275085 |
| H | -4.038902 | 1.607485  | -1.020898 |
| H | -3.226660 | 1.595877  | 0.562223  |
| C | -4.520331 | 3.328681  | 0.202932  |
| H | -5.414986 | 2.841450  | 0.629443  |
| H | -4.054177 | 3.908578  | 1.023987  |
| C | -4.913876 | 4.279447  | -0.937793 |
| H | -5.588698 | 5.066896  | -0.560816 |
| H | -5.486094 | 3.718248  | -1.702898 |
| C | -3.674393 | 4.911454  | -1.587096 |
| H | -3.167661 | 5.571840  | -0.856580 |
| H | -3.963888 | 5.551474  | -2.438488 |
| C | -2.674378 | 3.842488  | -2.074265 |
| H | -3.146672 | 3.257363  | -2.889389 |
| H | -1.786699 | 4.335314  | -2.508427 |
| C | 2.673616  | 2.983589  | -2.670076 |
| H | 2.613906  | 3.933767  | -2.114408 |
| H | 2.547044  | 3.202727  | -3.753030 |
| C | -2.788458 | -1.584254 | -3.223793 |
| H | -2.685926 | -2.643172 | -2.944506 |
| H | -2.713029 | -1.475718 | -4.315697 |
| P | -1.028537 | -1.516981 | 1.287473  |
| P | 1.109819  | 0.621078  | 1.783102  |
| N | -1.476310 | 0.796706  | 2.789971  |
| N | 1.675399  | -2.145721 | 1.826083  |
| C | -1.690759 | -0.648504 | 2.850394  |
| H | -2.776069 | -0.833828 | 2.895558  |
| H | -1.239168 | -1.109978 | 3.753270  |
| C | -0.105137 | 1.196040  | 3.113847  |
| H | 0.209883  | 0.837870  | 4.116918  |
| H | -0.067245 | 2.299272  | 3.124727  |
| C | 0.314717  | -2.656795 | 1.960770  |
| H | 0.055940  | -2.913804 | 3.017554  |
| H | 0.247080  | -3.594985 | 1.379928  |
| C | 1.913689  | -0.907082 | 2.567688  |
| H | 3.001821  | -0.722874 | 2.564416  |
| H | 1.608224  | -0.976020 | 3.639487  |
| C | -2.399439 | -2.768611 | 0.911630  |
| H | -1.992875 | -3.341272 | 0.048961  |
| C | -2.703260 | -3.772927 | 2.048520  |

---

|   |           |           |           |
|---|-----------|-----------|-----------|
| H | -1.789874 | -4.307102 | 2.362521  |
| H | -3.073258 | -3.222718 | 2.936081  |
| C | -3.771604 | -4.794351 | 1.607168  |
| H | -3.356464 | -5.422806 | 0.794641  |
| H | -3.991023 | -5.476532 | 2.446738  |
| C | -5.056178 | -4.107545 | 1.121942  |
| H | -5.781368 | -4.859605 | 0.766745  |
| H | -5.538954 | -3.584249 | 1.970329  |
| C | -4.757898 | -3.092723 | 0.006964  |
| H | -5.680690 | -2.565761 | -0.294670 |
| H | -4.390241 | -3.631736 | -0.890099 |
| C | -3.697901 | -2.069359 | 0.456994  |
| H | -4.113228 | -1.477967 | 1.296905  |
| H | -3.491576 | -1.334498 | -0.347450 |
| C | 2.447213  | 1.942213  | 1.914028  |
| H | 1.918636  | 2.859422  | 1.577805  |
| C | 3.601377  | 1.676621  | 0.926499  |
| H | 4.111912  | 0.730553  | 1.197782  |
| H | 3.191758  | 1.551670  | -0.091762 |
| C | 4.632605  | 2.821610  | 0.962483  |
| H | 5.464585  | 2.591091  | 0.273022  |
| H | 4.156444  | 3.748346  | 0.584227  |
| C | 5.161992  | 3.063395  | 2.384129  |
| H | 5.865015  | 3.914204  | 2.390646  |
| H | 5.739112  | 2.178025  | 2.716529  |
| C | 4.010632  | 3.320443  | 3.366820  |
| H | 3.503777  | 4.269854  | 3.104135  |
| H | 4.395587  | 3.445086  | 4.394032  |
| C | 2.976829  | 2.175541  | 3.347561  |
| H | 3.459736  | 1.250623  | 3.719802  |
| H | 2.153180  | 2.408685  | 4.046170  |
| C | -2.486408 | 1.572080  | 3.529540  |
| H | -2.327870 | 2.646265  | 3.340789  |
| H | -2.443343 | 1.398111  | 4.623908  |
| C | 2.634031  | -3.184544 | 2.241451  |
| H | 2.478678  | -4.091963 | 1.634244  |
| H | 2.535680  | -3.463879 | 3.313879  |
| H | 3.662636  | -2.827580 | 2.068645  |
| H | -3.492339 | 1.299922  | 3.170534  |
| H | -3.757788 | -1.199993 | -2.874447 |
| H | 3.679118  | 2.559894  | -2.513236 |
| H | -1.170098 | 0.807546  | 0.964930  |
| H | -1.723012 | -0.884197 | -1.504699 |

---

[H<sub>2</sub>Ni(P<sub>2</sub><sup>Cy</sup>N<sub>2</sub><sup>Me</sup>)<sub>2</sub>]<sup>2+</sup> Transition state between second proton-hydride and di-proton

E = -3168.59023

|    |           |           |           |
|----|-----------|-----------|-----------|
| Ni | -0.206608 | -0.097954 | -0.044877 |
| P  | 0.966390  | 0.577864  | 1.739815  |
| P  | -1.016661 | -1.645313 | 1.247507  |
| N  | 1.632297  | -2.132678 | 2.032782  |
| N  | -1.699586 | 0.707346  | 2.590380  |
| C  | 1.728395  | -0.857663 | 2.729339  |
| H  | 2.798463  | -0.616023 | 2.843969  |
| H  | 1.300140  | -0.882088 | 3.762106  |
| C  | 0.298742  | -2.715077 | 2.073873  |
| H  | -0.032407 | -2.967713 | 3.112259  |
| H  | 0.319729  | -3.661808 | 1.503900  |
| C  | -0.334506 | 1.226434  | 2.963789  |
| H  | -0.145349 | 0.961159  | 4.016828  |
| H  | -0.377926 | 2.324263  | 2.874052  |
| C  | -1.814689 | -0.789176 | 2.761555  |
| H  | -2.887473 | -1.032200 | 2.800747  |
| H  | -1.353739 | -1.066872 | 3.722648  |
| C  | 2.255857  | 1.947199  | 1.918992  |
| H  | 1.779386  | 2.810287  | 1.409028  |
| C  | 2.581121  | 2.332200  | 3.380637  |
| H  | 1.671991  | 2.634273  | 3.932562  |
| H  | 3.000042  | 1.454883  | 3.911911  |
| C  | 3.609272  | 3.481368  | 3.432060  |
| H  | 3.152454  | 4.395007  | 3.003417  |
| H  | 3.842049  | 3.711981  | 4.486313  |
| C  | 4.887043  | 3.132937  | 2.656447  |
| H  | 5.588796  | 3.984387  | 2.677726  |
| H  | 5.403283  | 2.289246  | 3.155287  |
| C  | 4.560815  | 2.748027  | 1.206191  |
| H  | 5.478763  | 2.455109  | 0.666104  |
| H  | 4.149075  | 3.629152  | 0.675496  |
| C  | 3.539029  | 1.595833  | 1.137278  |
| H  | 4.003685  | 0.685493  | 1.565676  |
| H  | 3.277205  | 1.371268  | 0.089769  |
| C  | -2.336571 | -2.911425 | 0.800944  |
| H  | -1.863798 | -3.459278 | -0.042113 |
| C  | -3.613156 | -2.228950 | 0.265736  |
| H  | -4.094913 | -1.649108 | 1.080387  |
| H  | -3.356194 | -1.503183 | -0.527154 |
| C  | -4.624964 | -3.272833 | -0.246030 |
| H  | -5.537778 | -2.761386 | -0.599779 |
| H  | -4.193973 | -3.795311 | -1.123179 |

---

|   |           |           |           |
|---|-----------|-----------|-----------|
| C | -4.968748 | -4.299516 | 0.844198  |
| H | -5.657497 | -5.063007 | 0.443833  |
| H | -5.509979 | -3.792103 | 1.667124  |
| C | -3.702591 | -4.967448 | 1.399551  |
| H | -3.227334 | -5.579065 | 0.607840  |
| H | -3.956880 | -5.661465 | 2.219306  |
| C | -2.681693 | -3.929881 | 1.910959  |
| H | -3.116479 | -3.398219 | 2.781650  |
| H | -1.777415 | -4.448853 | 2.273693  |
| C | 2.630746  | -3.096854 | 2.522432  |
| H | 2.574500  | -4.017442 | 1.918455  |
| H | 2.486972  | -3.370827 | 3.590875  |
| C | -2.803739 | 1.462139  | 3.267170  |
| H | -2.700288 | 2.532193  | 3.034169  |
| H | -2.735458 | 1.307539  | 4.354002  |
| P | -1.016141 | 1.575672  | -1.254684 |
| P | 1.154319  | -0.556009 | -1.768333 |
| N | -1.431460 | -0.746743 | -2.700799 |
| N | 1.688239  | 2.211997  | -1.791563 |
| C | -1.691811 | 0.699492  | -2.810532 |
| H | -2.781724 | 0.853334  | -2.845768 |
| H | -1.258402 | 1.127753  | -3.733218 |
| C | -0.064681 | -1.123461 | -3.103875 |
| H | 0.187250  | -0.729943 | -4.106749 |
| H | -0.016587 | -2.224844 | -3.144125 |
| C | 0.325766  | 2.711197  | -1.944311 |
| H | 0.073569  | 2.953573  | -3.006415 |
| H | 0.248242  | 3.656363  | -1.376529 |
| C | 1.949833  | 0.983011  | -2.539306 |
| H | 3.039675  | 0.810033  | -2.523559 |
| H | 1.657832  | 1.056550  | -3.615042 |
| C | -2.380815 | 2.837921  | -0.889133 |
| H | -1.965437 | 3.417385  | -0.035545 |
| C | -2.686145 | 3.830362  | -2.035885 |
| H | -1.771830 | 4.353925  | -2.364559 |
| H | -3.067784 | 3.271687  | -2.913550 |
| C | -3.743257 | 4.865454  | -1.599252 |
| H | -3.316821 | 5.500295  | -0.797715 |
| H | -3.964045 | 5.539121  | -2.445338 |
| C | -5.029143 | 4.194527  | -1.095630 |
| H | -5.745309 | 4.956460  | -0.743164 |
| H | -5.523163 | 3.665690  | -1.934167 |
| C | -4.729879 | 3.190218  | 0.028499  |
| H | -5.654271 | 2.673758  | 0.343139  |
| H | -4.350800 | 3.735555  | 0.916700  |

---

|   |           |           |           |
|---|-----------|-----------|-----------|
| C | -3.680646 | 2.153826  | -0.417197 |
| H | -4.107186 | 1.555136  | -1.246801 |
| H | -3.473037 | 1.429771  | 0.396074  |
| C | 2.496152  | -1.869891 | -1.929267 |
| H | 1.974442  | -2.793610 | -1.600322 |
| C | 3.659039  | -1.615215 | -0.948867 |
| H | 4.163944  | -0.663230 | -1.209323 |
| H | 3.258564  | -1.508036 | 0.074614  |
| C | 4.693441  | -2.756110 | -1.012605 |
| H | 5.530905  | -2.533413 | -0.327346 |
| H | 4.223946  | -3.690220 | -0.644389 |
| C | 5.210516  | -2.973794 | -2.442607 |
| H | 5.916141  | -3.822041 | -2.468959 |
| H | 5.781681  | -2.081457 | -2.766466 |
| C | 4.051031  | -3.219424 | -3.418745 |
| H | 3.549810  | -4.174628 | -3.166415 |
| H | 4.426825  | -3.326233 | -4.451354 |
| C | 3.013976  | -2.078484 | -3.370886 |
| H | 3.490418  | -1.145936 | -3.732189 |
| H | 2.185157  | -2.302896 | -4.066774 |
| C | -2.474261 | -1.594324 | -3.313415 |
| H | -2.277318 | -2.648105 | -3.059271 |
| H | -2.495745 | -1.491569 | -4.414611 |
| C | 2.647498  | 3.262568  | -2.174028 |
| H | 2.474095  | 4.160262  | -1.557467 |
| H | 2.569325  | 3.555896  | -3.244419 |
| H | 3.674739  | 2.909988  | -1.984636 |
| H | -3.459429 | -1.310687 | -2.911313 |
| H | -3.770785 | 1.092492  | 2.896108  |
| H | 3.640962  | -2.671945 | 2.403060  |
| H | -1.725934 | 0.836805  | 1.526144  |
| H | -1.165436 | -0.764416 | -1.179311 |

$[\text{H}_2\text{Ni}(\text{P}_2^{\text{Cy}}\text{N}_2^{\text{Me}})_2]^{2+}$  di-proton

E = -3168.59908

|    |           |           |           |
|----|-----------|-----------|-----------|
| Ni | 0.139754  | -0.000001 | 0.000009  |
| P  | 1.025004  | -1.576921 | -1.224096 |
| P  | -1.075405 | 0.554899  | -1.763689 |
| N  | 1.553765  | 0.759469  | -2.675709 |
| N  | -1.637987 | -2.191102 | -1.924462 |
| C  | 1.774955  | -0.730567 | -2.772757 |
| H  | 2.863107  | -0.895421 | -2.790187 |
| H  | 1.348820  | -1.085641 | -3.724419 |

S37

---

|   |           |           |           |
|---|-----------|-----------|-----------|
| C | 0.158463  | 1.163883  | -3.078196 |
| H | -0.026130 | 0.792687  | -4.099473 |
| H | 0.138492  | 2.266010  | -3.089011 |
| C | -0.275976 | -2.698437 | -2.019656 |
| H | 0.026070  | -2.926470 | -3.072520 |
| H | -0.231018 | -3.651777 | -1.461902 |
| C | -1.848430 | -0.941473 | -2.645985 |
| H | -2.935336 | -0.753074 | -2.678142 |
| H | -1.504830 | -0.984516 | -3.709277 |
| C | 2.389299  | -2.844619 | -0.861235 |
| H | 1.944875  | -3.437060 | -0.031656 |
| C | 2.738526  | -3.819229 | -2.009136 |
| H | 1.838008  | -4.338942 | -2.379401 |
| H | 3.153353  | -3.250026 | -2.865574 |
| C | 3.781314  | -4.859033 | -1.549195 |
| H | 3.326436  | -5.505832 | -0.773426 |
| H | 4.035476  | -5.520308 | -2.395714 |
| C | 5.045730  | -4.193137 | -0.987506 |
| H | 5.750439  | -4.959056 | -0.620858 |
| H | 5.569312  | -3.650478 | -1.799133 |
| C | 4.702573  | -3.206997 | 0.140192  |
| H | 5.613544  | -2.694164 | 0.497310  |
| H | 4.291422  | -3.766055 | 1.004891  |
| C | 3.667479  | -2.165923 | -0.327366 |
| H | 4.126979  | -1.552836 | -1.129873 |
| H | 3.422189  | -1.456875 | 0.488022  |
| C | -2.393219 | 1.893192  | -1.968239 |
| H | -1.881517 | 2.803377  | -1.589391 |
| C | -3.595385 | 1.617306  | -1.041850 |
| H | -4.090845 | 0.672906  | -1.344458 |
| H | -3.232980 | 1.484477  | -0.007731 |
| C | -4.624188 | 2.762303  | -1.116654 |
| H | -5.488903 | 2.523222  | -0.471987 |
| H | -4.168508 | 3.684726  | -0.704538 |
| C | -5.083216 | 3.020254  | -2.559545 |
| H | -5.785822 | 3.870818  | -2.591384 |
| H | -5.642006 | 2.138650  | -2.930859 |
| C | -3.884733 | 3.289754  | -3.480780 |
| H | -3.392301 | 4.235818  | -3.180995 |
| H | -4.218055 | 3.426733  | -4.524388 |
| C | -2.853404 | 2.144012  | -3.421777 |
| H | -3.317854 | 1.224254  | -3.828414 |
| H | -1.998735 | 2.385737  | -4.080794 |
| C | 2.609321  | 1.557742  | -3.376360 |
| H | 2.430470  | 2.627253  | -3.190605 |

---

|   |           |           |           |
|---|-----------|-----------|-----------|
| H | 2.562599  | 1.354412  | -4.456355 |
| C | -2.597340 | -3.221031 | -2.353998 |
| H | -2.460483 | -4.127218 | -1.740815 |
| H | -2.485209 | -3.504616 | -3.424159 |
| P | -1.075299 | -0.554886 | 1.763781  |
| P | 1.025121  | 1.576891  | 1.224066  |
| N | -1.637803 | 2.191131  | 1.924647  |
| N | 1.553930  | -0.759526 | 2.675611  |
| C | -1.848212 | 0.941495  | 2.646168  |
| H | -2.935119 | 0.753121  | 2.678425  |
| H | -1.504511 | 0.984514  | 3.709428  |
| C | -0.275772 | 2.698437  | 2.019726  |
| H | 0.026362  | 2.926464  | 3.072565  |
| H | -0.230837 | 3.651775  | 1.461968  |
| C | 0.158649  | -1.163926 | 3.078186  |
| H | -0.025866 | -0.792756 | 4.099486  |
| H | 0.138663  | -2.266053 | 3.088970  |
| C | 1.775149  | 0.730505  | 2.772672  |
| H | 2.863305  | 0.895341  | 2.790041  |
| H | 1.349075  | 1.085571  | 3.724364  |
| C | -2.393138 | -1.893150 | 1.968383  |
| H | -1.881370 | -2.803403 | 1.589792  |
| C | -2.853567 | -2.143685 | 3.421893  |
| H | -1.999012 | -2.385280 | 4.081102  |
| H | -3.318087 | -1.223846 | 3.828270  |
| C | -3.884904 | -3.289417 | 3.480950  |
| H | -3.392417 | -4.235541 | 3.181439  |
| H | -4.218403 | -3.426188 | 4.524529  |
| C | -5.083230 | -3.020107 | 2.559456  |
| H | -5.785839 | -3.870667 | 2.591348  |
| H | -5.642086 | -2.138430 | 2.930497  |
| C | -4.623958 | -2.762450 | 1.116592  |
| H | -5.488564 | -2.523505 | 0.471728  |
| H | -4.168200 | -3.684954 | 0.704742  |
| C | -3.595150 | -1.617461 | 1.041732  |
| H | -4.090671 | -0.673004 | 1.344058  |
| H | -3.232574 | -1.484842 | 0.007645  |
| C | 2.389429  | 2.844553  | 0.861135  |
| H | 1.945041  | 3.436910  | 0.031476  |
| C | 3.667636  | 2.165802  | 0.327399  |
| H | 4.127095  | 1.552800  | 1.129994  |
| H | 3.422386  | 1.456667  | -0.487924 |
| C | 4.702752  | 3.206827  | -0.140218 |
| H | 5.613740  | 2.693958  | -0.497238 |
| H | 4.291642  | 3.765794  | -1.004996 |

---

|   |           |           |           |
|---|-----------|-----------|-----------|
| C | 5.045853  | 4.193087  | 0.987392  |
| H | 5.750579  | 4.958969  | 0.620697  |
| H | 5.569398  | 3.650515  | 1.799101  |
| C | 3.781410  | 4.859040  | 1.548951  |
| H | 3.326567  | 5.505757  | 0.773093  |
| H | 4.035530  | 5.520404  | 2.395413  |
| C | 2.738602  | 3.819282  | 2.008952  |
| H | 3.153391  | 3.250169  | 2.865468  |
| H | 1.838065  | 4.339031  | 2.379121  |
| C | -2.597094 | 3.221076  | 2.354283  |
| H | -2.460271 | 4.127268  | 1.741100  |
| H | -2.484861 | 3.504643  | 3.424438  |
| C | 2.609522  | -1.557829 | 3.376172  |
| H | 2.430640  | -2.627334 | 3.190410  |
| H | 2.562881  | -1.354519 | 4.456174  |
| H | 3.596723  | -1.271880 | 2.984476  |
| H | -3.625053 | 2.854446  | 2.197598  |
| H | -3.625276 | -2.854375 | -2.197227 |
| H | 3.596545  | 1.271783  | -2.984729 |
| H | 1.554006  | 0.934122  | -1.613107 |
| H | 1.554095  | -0.934159 | 1.613006  |
